# Supplementary material for: Recovering Drug-Induced Apoptosis Subnetwork from Connectivity Map Data
Source: Hindawi journal article supplement (doi:10.1155/2015/708563), 2015-01-01
Supplement: f1 [file 708563.f1.pdf]

**A**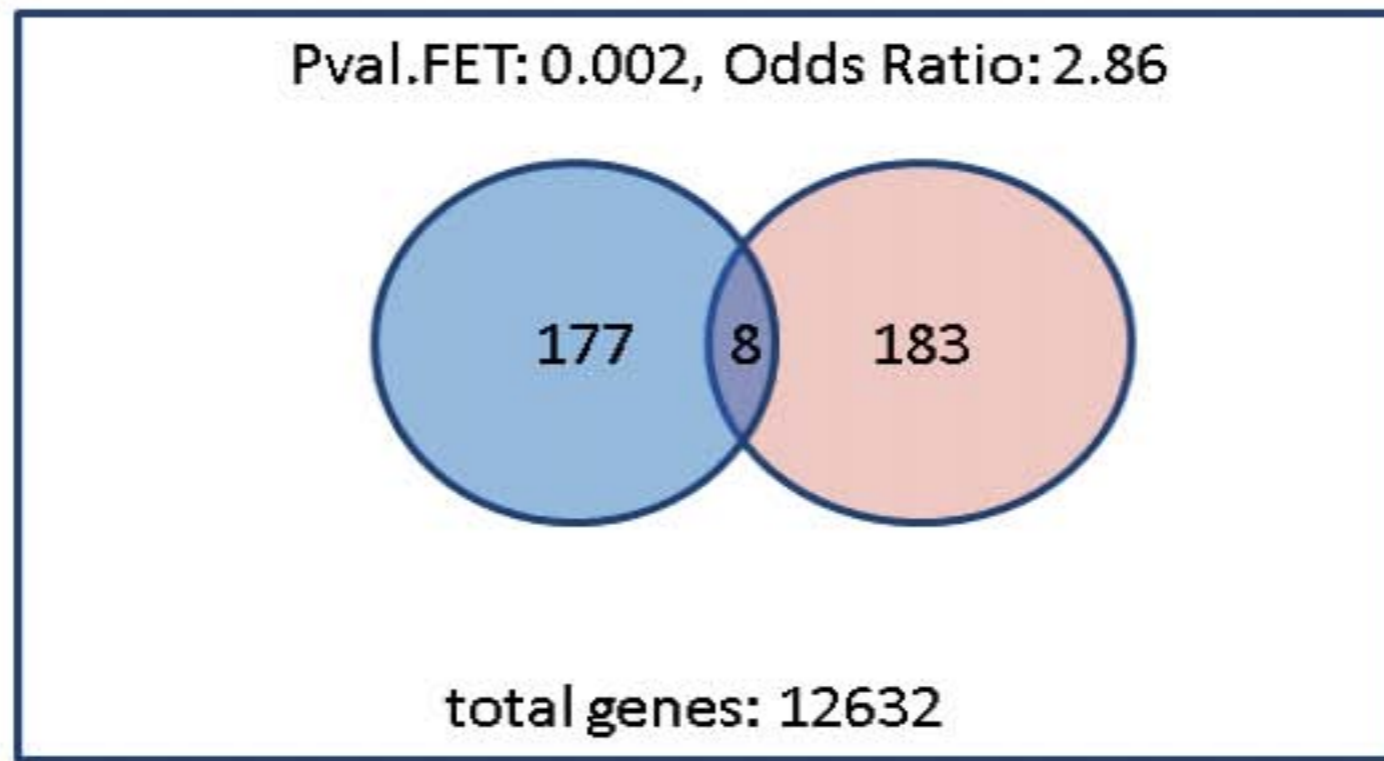

Figure Supp.1

**B**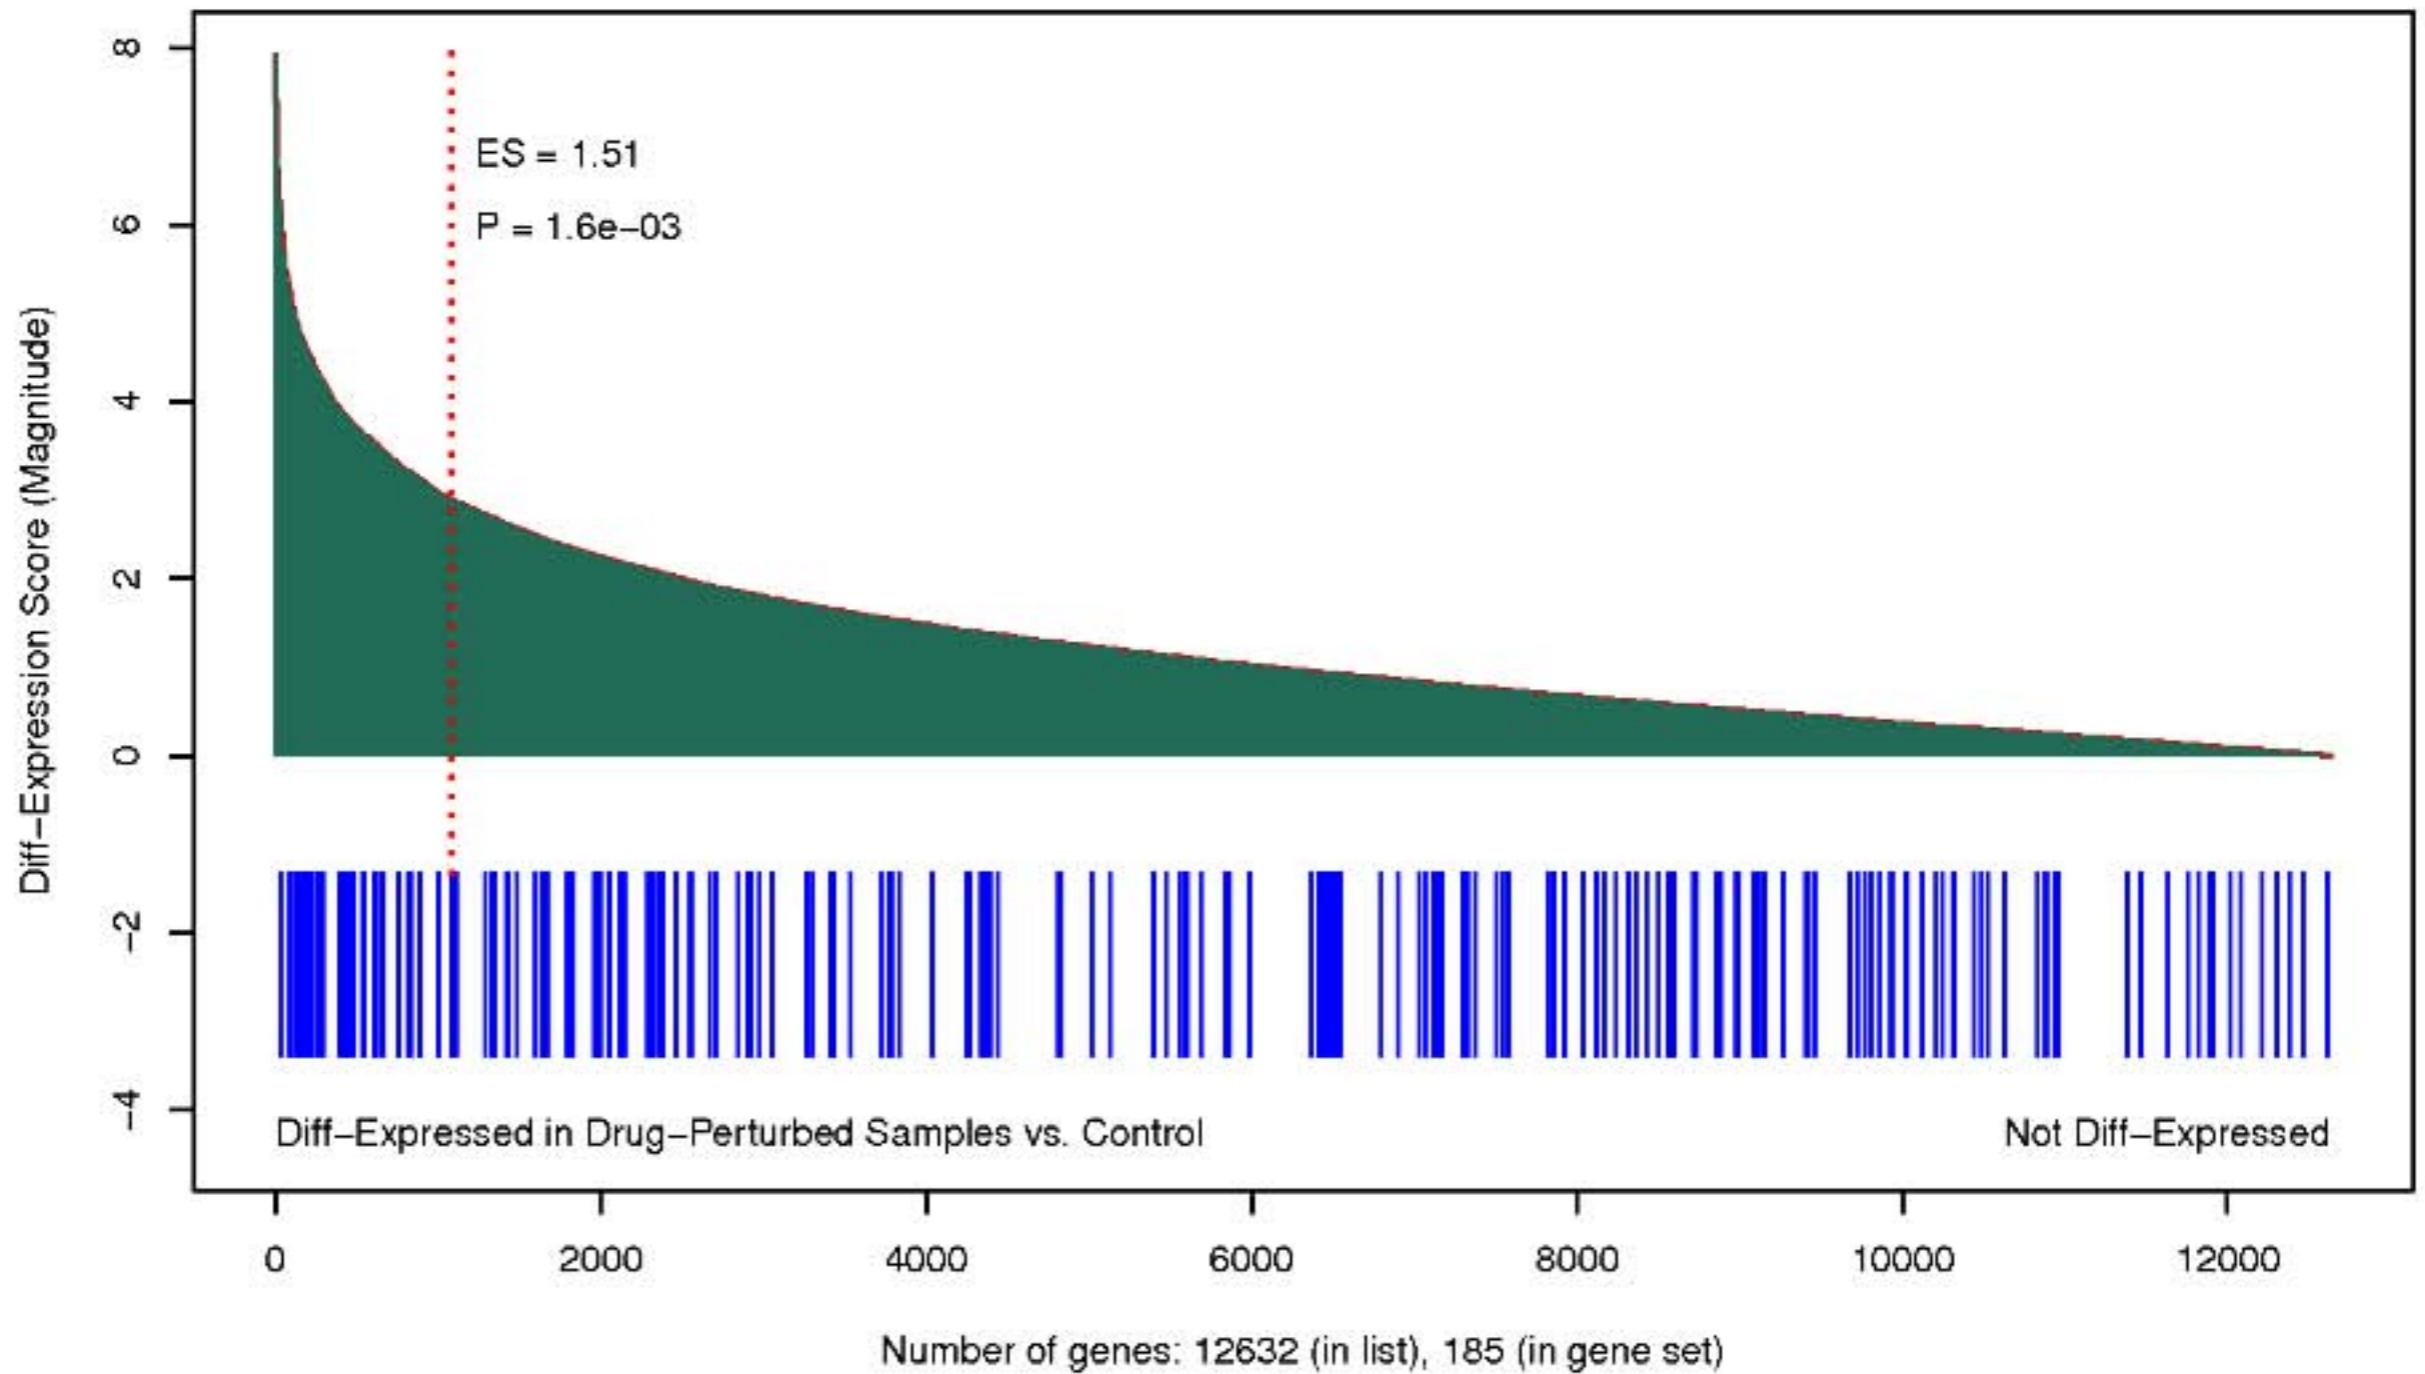

A

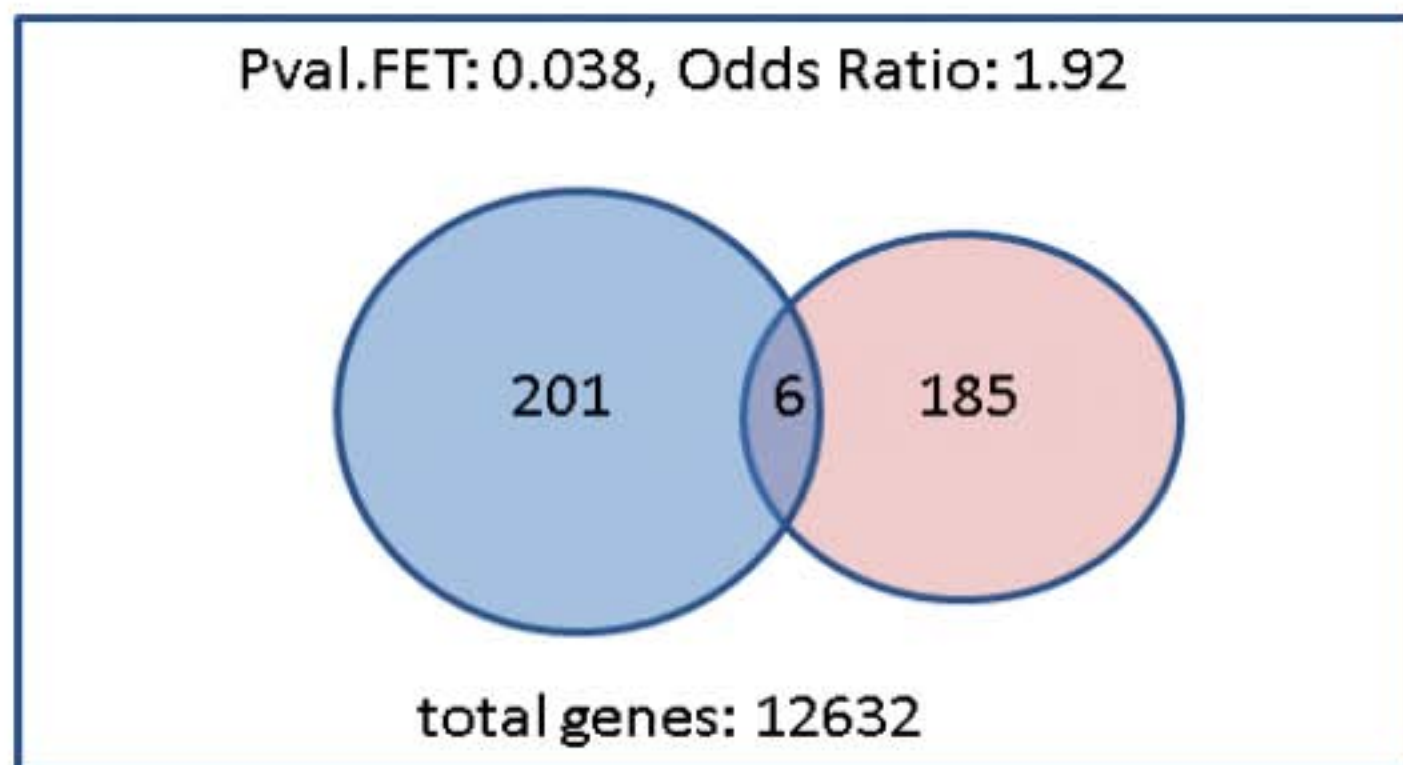

B

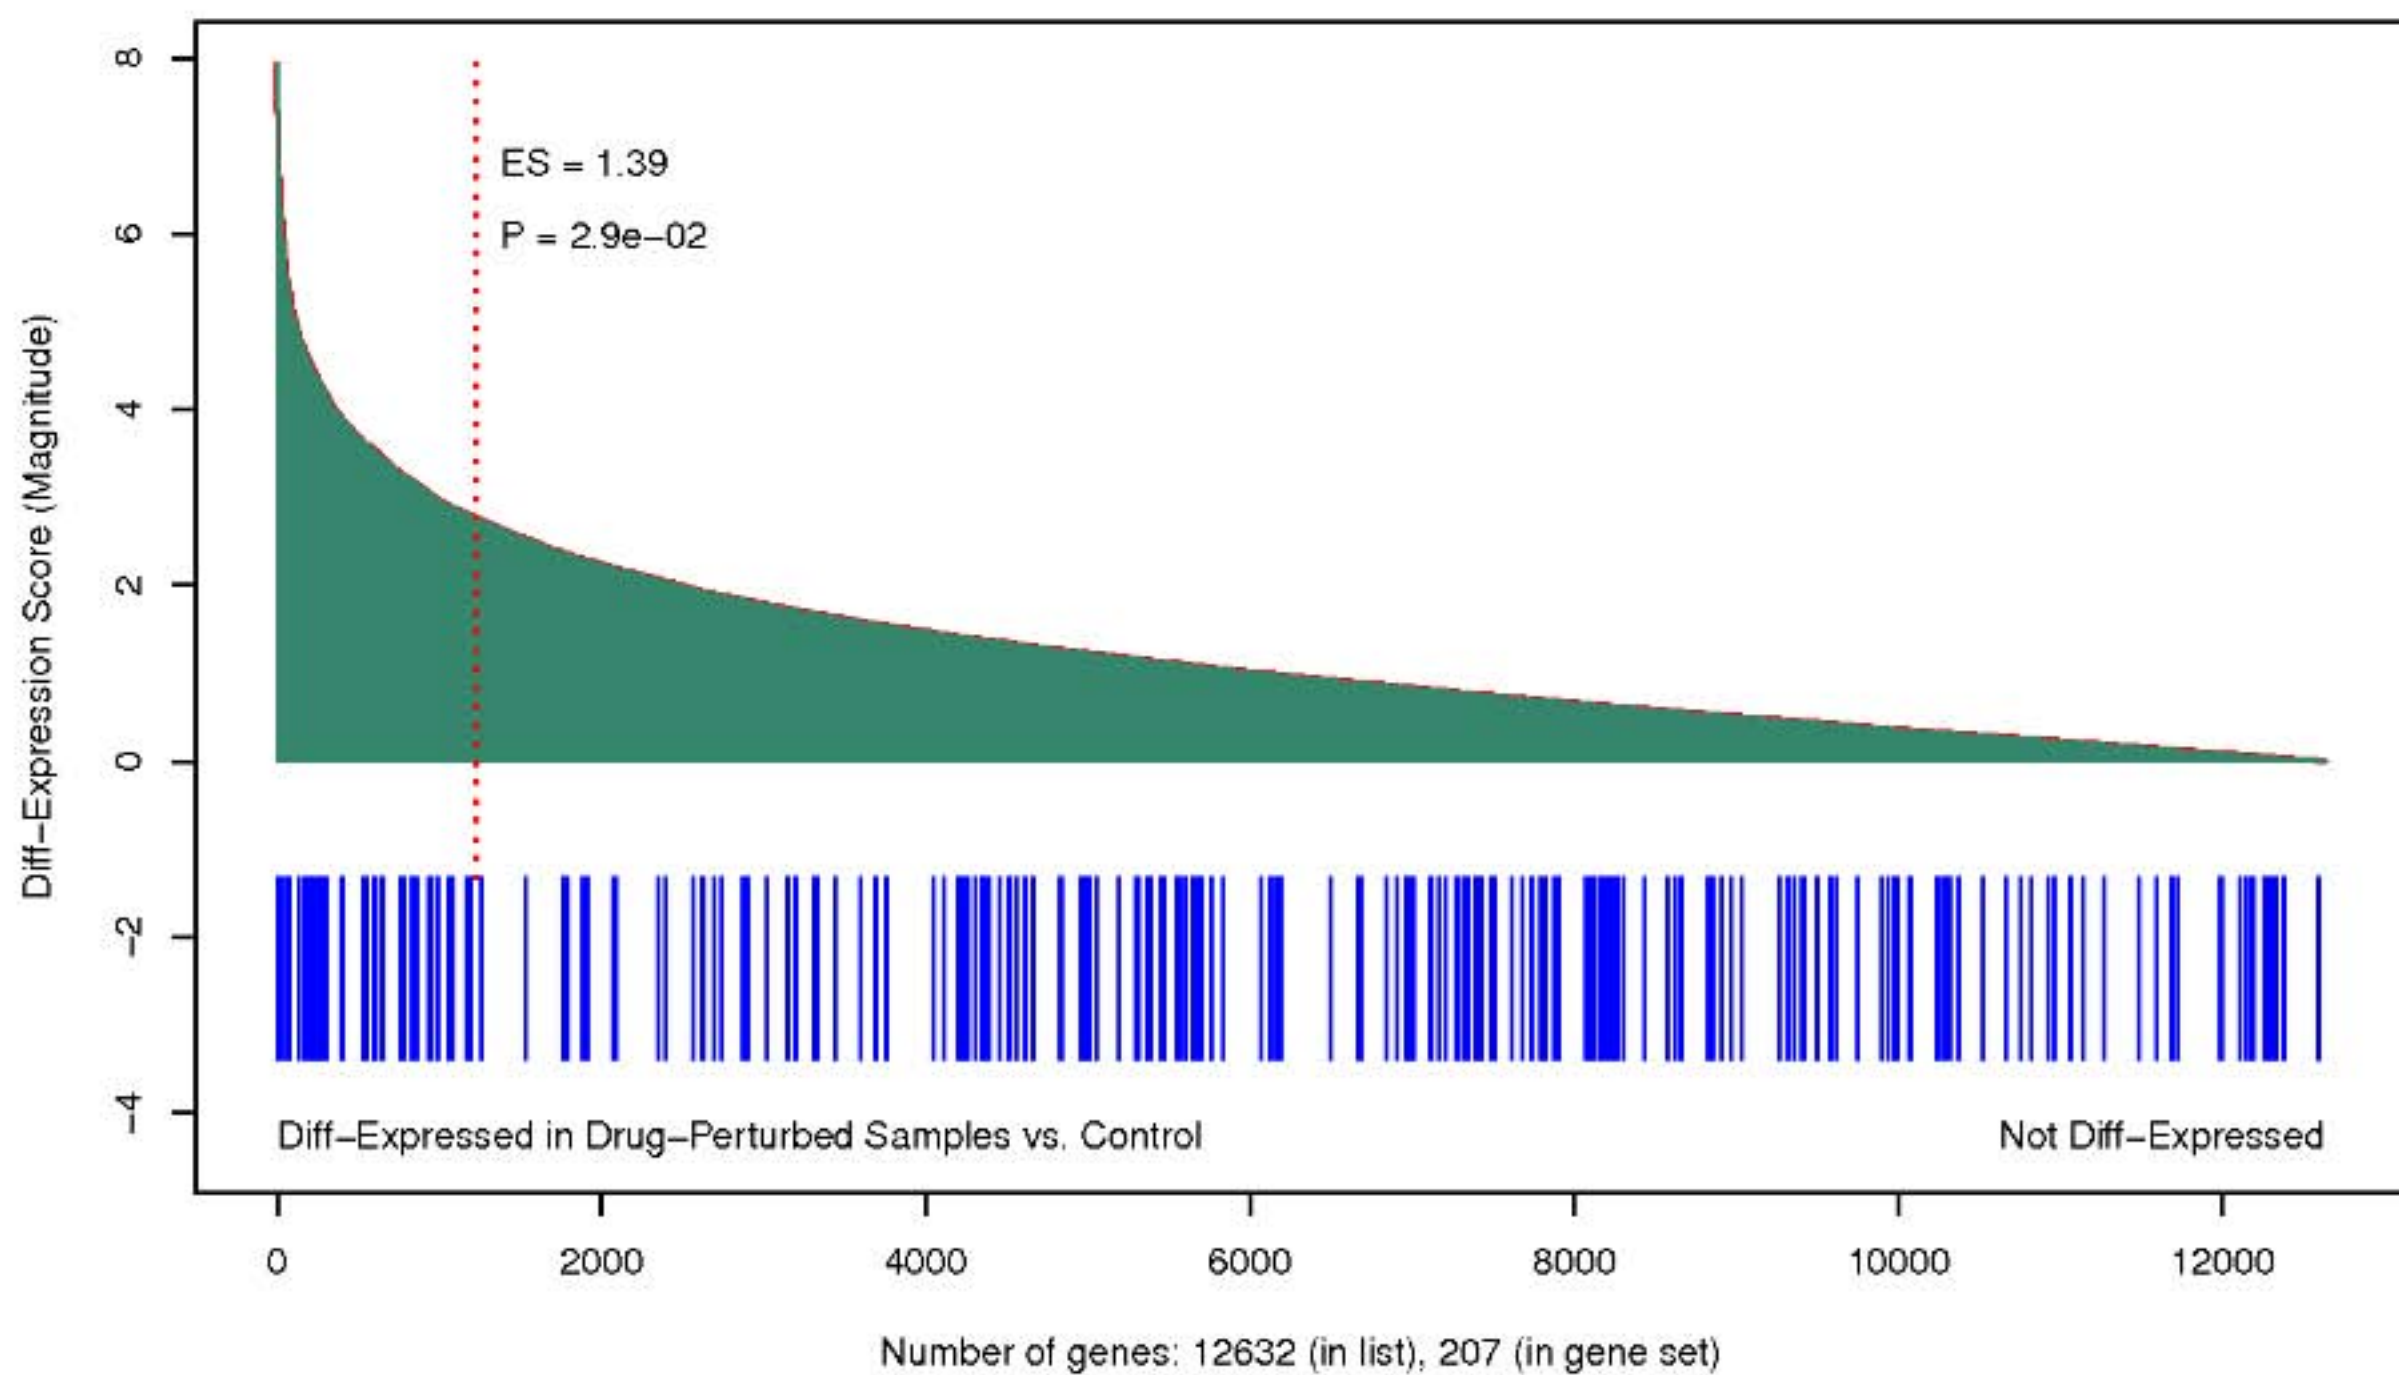

**Supplementary Table S1: The 191 differentially-expressed drug-responsive si**

| <b>probeld</b> | <b>geneSymbol</b> | <b>entrezId</b> | <b>logFC</b> | <b>aveExpr</b> | <b>t</b> | <b>P.Value</b> |
|----------------|-------------------|-----------------|--------------|----------------|----------|----------------|
| 36711_at       | MAFF              | 23764           | 0.55         | 4.09           | 8.05     | 1.18E-15       |
| 202672_s_at    | ATF3              | 467             | 0.54         | 3.87           | 7.93     | 3.17E-15       |
| 202887_s_at    | DDIT4             | 54541           | 0.30         | 8.77           | 7.53     | 6.83E-14       |
| 203455_s_at    | SAT1              | 6303            | 0.25         | 7.28           | 7.51     | 7.78E-14       |
| 204285_s_at    | PMAIP1            | 5366            | 0.32         | 5.93           | 7.46     | 1.19E-13       |
| 217168_s_at    | HERPUD1           | 9709            | 0.18         | 8.91           | 7.34     | 2.86E-13       |
| 208786_s_at    | MAP1LC3B          | 81631           | 0.19         | 9.39           | 7.25     | 5.47E-13       |
| 202770_s_at    | CCNG2             | 901             | 0.30         | 5.36           | 7.22     | 6.78E-13       |
| 205047_s_at    | ASNS              | 440             | 0.14         | 10.12          | 7.10     | 1.55E-12       |
| 219270_at      | CHAC1             | 79094           | 0.27         | 3.43           | 6.93     | 5.13E-12       |
| 201694_s_at    | EGR1              | 1958            | 0.54         | 3.80           | 6.85     | 8.88E-12       |
| 202557_at      | HSPA13            | 6782            | 0.19         | 7.83           | 6.79     | 1.32E-11       |
| 209383_at      | DDIT3             | 1649            | 0.29         | 4.65           | 6.76     | 1.72E-11       |
| 206277_at      | P2RY2             | 5029            | -0.20        | 5.65           | -6.73    | 1.98E-11       |
| 209121_x_at    | NR2F2             | 7026            | -0.19        | 9.57           | -6.70    | 2.52E-11       |
| 203725_at      | GADD45A           | 1647            | 0.21         | 7.82           | 6.69     | 2.67E-11       |
| 214141_x_at    | SFRS7             | 6432            | -0.11        | 11.67          | -6.62    | 4.22E-11       |
| 201266_at      | TXNRD1            | 7296            | 0.11         | 10.80          | 6.46     | 1.22E-10       |
| 212623_at      | TMEM41B           | 440026          | 0.13         | 8.86           | 6.46     | 1.22E-10       |
| 212888_at      | DICER1            | 23405           | -0.10        | 9.31           | -6.43    | 1.46E-10       |
| 217678_at      | SLC7A11           | 23657           | 0.30         | 6.28           | 6.41     | 1.71E-10       |
| 209146_at      | SC4MOL            | 6307            | 0.13         | 10.76          | 6.40     | 1.81E-10       |
| 202911_at      | MSH6              | 2956            | -0.09        | 10.17          | -6.40    | 1.87E-10       |
| 209185_s_at    | IRS2              | 8660            | 0.21         | 3.47           | 6.39     | 1.92E-10       |
| 216248_s_at    | NR4A2             | 4929            | 0.18         | 3.27           | 6.38     | 2.03E-10       |
| 221985_at      | KLHL24            | 54800           | 0.30         | 4.34           | 6.38     | 2.05E-10       |
| 209102_s_at    | HBP1              | 26959           | 0.16         | 7.38           | 6.38     | 2.09E-10       |
| 215945_s_at    | TRIM2             | 23321           | 0.15         | 3.69           | 6.36     | 2.39E-10       |
| 212274_at      | LPIN1             | 23175           | 0.24         | 8.22           | 6.33     | 2.90E-10       |
| 202727_s_at    | IFNGR1            | 3459            | 0.13         | 8.38           | 6.31     | 3.15E-10       |
| 202613_at      | CTPS              | 1503            | -0.12        | 9.00           | -6.30    | 3.43E-10       |
| 219127_at      | ATAD4             | 79170           | -0.26        | 7.27           | -6.27    | 4.07E-10       |
| 219681_s_at    | RAB11FIP1         | 80223           | 0.14         | 7.24           | 6.19     | 6.90E-10       |
| 210512_s_at    | VEGFA             | 7422            | 0.18         | 8.05           | 6.15     | 8.88E-10       |
| 202679_at      | NPC1              | 4864            | 0.17         | 8.17           | 6.13     | 1.00E-09       |
| 201627_s_at    | INSIG1            | 3638            | 0.20         | 8.57           | 6.12     | 1.05E-09       |
| 220081_x_at    | HSD17B7           | 51478           | 0.13         | 7.78           | 6.07     | 1.44E-09       |
| 202722_s_at    | GFPT1             | 2673            | 0.10         | 9.03           | 6.05     | 1.59E-09       |
| 208881_x_at    | IDI1              | 3422            | 0.12         | 11.22          | 6.05     | 1.62E-09       |
| 202211_at      | ARFGAP3           | 26286           | 0.16         | 7.45           | 6.05     | 1.68E-09       |
| 202539_s_at    | HMGCR             | 3156            | 0.16         | 8.42           | 6.04     | 1.76E-09       |
| 219798_s_at    | MEPCE             | 56257           | -0.18        | 9.42           | -6.03    | 1.85E-09       |
| 218858_at      | DEPDC6            | 64798           | 0.19         | 4.89           | 6.01     | 2.09E-09       |
| 208804_s_at    | SFRS6             | 6431            | -0.09        | 9.47           | -5.98    | 2.56E-09       |
| 212798_s_at    | ANKMY2            | 57037           | 0.14         | 7.96           | 5.97     | 2.60E-09       |
| 205527_s_at    | GEMIN4            | 50628           | -0.16        | 8.16           | -5.96    | 2.91E-09       |

|             |            |        |       |       |       |          |
|-------------|------------|--------|-------|-------|-------|----------|
| 217562_at   | FAM5C      | 339479 | -0.31 | 6.55  | -5.88 | 4.45E-09 |
| 37028_at    | PPP1R15A   | 23645  | 0.19  | 3.69  | 5.86  | 5.19E-09 |
| 209124_at   | MYD88      | 4615   | -0.12 | 8.78  | -5.86 | 5.24E-09 |
| 204695_at   | CDC25A     | 993    | -0.13 | 5.99  | -5.82 | 6.54E-09 |
| 204472_at   | GEM        | 2669   | 0.26  | 2.81  | 5.82  | 6.69E-09 |
| 212124_at   | ZMIZ1      | 57178  | -0.12 | 10.21 | -5.73 | 1.09E-08 |
| 221577_x_at | GDF15      | 9518   | 0.35  | 8.34  | 5.73  | 1.13E-08 |
| 209238_at   | STX3       | 6809   | 0.10  | 8.88  | 5.72  | 1.19E-08 |
| 215165_x_at | UMPS       | 7372   | -0.10 | 8.86  | -5.71 | 1.22E-08 |
| 202074_s_at | OPTN       | 10133  | 0.22  | 5.28  | 5.64  | 1.84E-08 |
| 218653_at   | SLC25A15   | 10166  | -0.11 | 8.83  | -5.64 | 1.84E-08 |
| 205356_at   | USP13      | 8975   | -0.10 | 8.79  | -5.63 | 1.93E-08 |
| 214657_s_at | NCRNA00084 | 283131 | 0.25  | 3.30  | 5.63  | 2.03E-08 |
| 203721_s_at | UTP18      | 51096  | -0.08 | 10.95 | -5.62 | 2.04E-08 |
| 212233_at   | MAP1B      | 4131   | 0.21  | 3.19  | 5.62  | 2.04E-08 |
| 221471_at   | SERINC3    | 10955  | 0.06  | 9.39  | 5.62  | 2.08E-08 |
| 209494_s_at | PATZ1      | 23598  | -0.19 | 5.85  | -5.61 | 2.22E-08 |
| 201925_s_at | CD55       | 1604   | 0.18  | 8.04  | 5.61  | 2.23E-08 |
| 218611_at   | IER5       | 51278  | 0.14  | 9.62  | 5.60  | 2.31E-08 |
| 41037_at    | TEAD4      | 7004   | -0.14 | 5.68  | -5.60 | 2.41E-08 |
| 201761_at   | MTHFD2     | 10797  | 0.07  | 11.76 | 5.58  | 2.59E-08 |
| 201586_s_at | SFPQ       | 6421   | -0.06 | 11.24 | -5.57 | 2.71E-08 |
| 205413_at   | MPPED2     | 744    | -0.22 | 7.79  | -5.57 | 2.76E-08 |
| 208933_s_at | LGALS8     | 3964   | 0.12  | 6.55  | 5.57  | 2.82E-08 |
| 211784_s_at | SFRS1      | 6426   | -0.06 | 12.35 | -5.57 | 2.85E-08 |
| 202107_s_at | MCM2       | 4171   | -0.07 | 10.65 | -5.56 | 3.03E-08 |
| 221750_at   | HMGCS1     | 3157   | 0.14  | 8.54  | 5.55  | 3.04E-08 |
| 217858_s_at | ARMCX3     | 51566  | 0.09  | 9.63  | 5.55  | 3.07E-08 |
| 212320_at   | TUBB       | 203068 | -0.09 | 12.00 | -5.55 | 3.11E-08 |
| 212335_at   | GNS        | 2799   | 0.10  | 8.66  | 5.49  | 4.30E-08 |
| 204326_x_at | MT1X       | 4501   | 0.21  | 8.91  | 5.49  | 4.49E-08 |
| 210999_s_at | GRB10      | 2887   | 0.15  | 4.00  | 5.48  | 4.74E-08 |
| 203666_at   | CXCL12     | 6387   | -0.30 | 6.48  | -5.47 | 4.81E-08 |
| 205241_at   | SCO2       | 9997   | -0.16 | 7.88  | -5.46 | 5.11E-08 |
| 203640_at   | MBNL2      | 10150  | 0.17  | 6.69  | 5.46  | 5.22E-08 |
| 203811_s_at | DNAJB4     | 11080  | 0.23  | 4.06  | 5.43  | 6.22E-08 |
| 211423_s_at | SC5DL      | 6309   | 0.09  | 9.47  | 5.43  | 6.25E-08 |
| 221613_s_at | ZFAND6     | 54469  | 0.06  | 10.06 | 5.42  | 6.29E-08 |
| 202809_s_at | INTS3      | 65123  | -0.12 | 7.47  | -5.40 | 7.29E-08 |
| 221235_s_at | LOC644617  | 644617 | -0.13 | 6.15  | -5.39 | 7.42E-08 |
| 202644_s_at | TNFAIP3    | 7128   | 0.24  | 3.97  | 5.39  | 7.61E-08 |
| 212689_s_at | JMJD1A     | 55818  | 0.14  | 7.06  | 5.37  | 8.44E-08 |
| 212330_at   | TFDP1      | 7027   | -0.07 | 9.90  | -5.33 | 1.07E-07 |
| 213762_x_at | RBMX       | 27316  | -0.06 | 11.24 | -5.32 | 1.10E-07 |
| 218769_s_at | ANKRA2     | 57763  | 0.14  | 6.34  | 5.32  | 1.11E-07 |
| 212022_s_at | MKI67      | 4288   | -0.09 | 9.89  | -5.32 | 1.13E-07 |
| 59625_at    | NOL3       | 8996   | -0.13 | 6.84  | -5.32 | 1.13E-07 |
| 218300_at   | C16orf53   | 79447  | -0.13 | 8.71  | -5.32 | 1.15E-07 |
| 218993_at   | RNMTL1     | 55178  | -0.08 | 8.94  | -5.29 | 1.30E-07 |
| 221069_s_at | CCDC44     | 51204  | -0.08 | 9.61  | -5.29 | 1.35E-07 |

|             |          |        |       |       |       |          |
|-------------|----------|--------|-------|-------|-------|----------|
| 208961_s_at | KLF6     | 1316   | 0.19  | 6.18  | 5.26  | 1.55E-07 |
| 205660_at   | OASL     | 8638   | 0.21  | 2.57  | 5.25  | 1.59E-07 |
| 219186_at   | ZBTB7A   | 51341  | -0.10 | 4.33  | -5.25 | 1.65E-07 |
| 218976_at   | DNAJC12  | 56521  | 0.21  | 6.85  | 5.25  | 1.65E-07 |
| 202364_at   | MXI1     | 4601   | 0.15  | 7.14  | 5.23  | 1.82E-07 |
| 209267_s_at | SLC39A8  | 64116  | -0.08 | 10.39 | -5.22 | 1.96E-07 |
| 205258_at   | INHBB    | 3625   | -0.18 | 9.72  | -5.20 | 2.11E-07 |
| 218364_at   | LRRFIP2  | 9209   | 0.10  | 6.23  | 5.20  | 2.11E-07 |
| 220192_x_at | SPDEF    | 25803  | -0.14 | 10.70 | -5.20 | 2.13E-07 |
| 213237_at   | C16orf88 | 400506 | -0.10 | 7.44  | -5.20 | 2.16E-07 |
| 218618_s_at | FNDC3B   | 64778  | 0.12  | 8.19  | 5.20  | 2.18E-07 |
| 214635_at   | CLDN9    | 9080   | -0.19 | 4.91  | -5.19 | 2.23E-07 |
| 202333_s_at | UBE2B    | 7320   | 0.07  | 9.98  | 5.19  | 2.29E-07 |
| 212993_at   | NACC2    | 138151 | -0.14 | 8.05  | -5.18 | 2.35E-07 |
| 210766_s_at | CSE1L    | 1434   | -0.05 | 11.08 | -5.18 | 2.37E-07 |
| 213417_at   | TBX2     | 6909   | -0.16 | 8.55  | -5.18 | 2.38E-07 |
| 200768_s_at | MAT2A    | 4144   | -0.11 | 9.80  | -5.18 | 2.39E-07 |
| 209189_at   | FOS      | 2353   | 0.21  | 2.44  | 5.18  | 2.42E-07 |
| 210239_at   | IRX5     | 10265  | -0.18 | 8.35  | -5.14 | 2.87E-07 |
| 202842_s_at | DNAJB9   | 4189   | 0.16  | 8.40  | 5.14  | 2.88E-07 |
| 200875_s_at | NOP56    | 10528  | -0.08 | 10.36 | -5.14 | 2.94E-07 |
| 203625_x_at | SKP2     | 6502   | -0.11 | 9.06  | -5.13 | 3.05E-07 |
| 203217_s_at | ST3GAL5  | 8869   | 0.19  | 3.64  | 5.13  | 3.16E-07 |
| 203821_at   | HBEGF    | 1839   | 0.15  | 3.03  | 5.10  | 3.64E-07 |
| 221962_s_at | UBE2H    | 7328   | 0.15  | 6.48  | 5.09  | 3.88E-07 |
| 205061_s_at | EXOSC9   | 5393   | -0.09 | 8.60  | -5.08 | 4.02E-07 |
| 212470_at   | SPAG9    | 9043   | 0.12  | 8.39  | 5.08  | 4.06E-07 |
| 213397_x_at | RNASE4   | 6038   | 0.13  | 2.05  | 5.07  | 4.26E-07 |
| 221291_at   | ULBP2    | 80328  | 0.21  | 3.35  | 5.07  | 4.27E-07 |
| 208056_s_at | CBFA2T3  | 863    | -0.22 | 8.79  | -5.06 | 4.45E-07 |
| 212907_at   | SLC30A1  | 7779   | 0.18  | 7.79  | 5.05  | 4.63E-07 |
| 213682_at   | NUP50    | 10762  | -0.07 | 9.21  | -5.05 | 4.72E-07 |
| 204488_at   | DOLK     | 22845  | -0.12 | 7.71  | -5.05 | 4.78E-07 |
| 202720_at   | TES      | 26136  | 0.15  | 7.97  | 5.05  | 4.80E-07 |
| 221479_s_at | BNIP3L   | 665    | 0.12  | 7.86  | 5.04  | 4.88E-07 |
| 200673_at   | LAPTM4A  | 9741   | 0.05  | 11.45 | 5.04  | 4.99E-07 |
| 204352_at   | TRAF5    | 7188   | -0.14 | 4.91  | -5.02 | 5.44E-07 |
| 202126_at   | PRPF4B   | 8899   | -0.08 | 9.43  | -5.02 | 5.63E-07 |
| 202710_at   | BET1     | 10282  | 0.09  | 8.30  | 5.00  | 6.09E-07 |
| 205870_at   | BDKRB2   | 624    | 0.10  | 2.56  | 5.00  | 6.18E-07 |
| 218853_s_at | MOSPD1   | 56180  | 0.09  | 8.98  | 4.97  | 7.08E-07 |
| 202388_at   | RGS2     | 5997   | 0.25  | 3.22  | 4.97  | 7.10E-07 |
| 202429_s_at | PPP3CA   | 5530   | -0.05 | 11.04 | -4.95 | 7.68E-07 |
| 218982_s_at | MRPS17   | 51373  | -0.06 | 9.73  | -4.95 | 7.87E-07 |
| 207543_s_at | P4HA1    | 5033   | 0.09  | 7.75  | 4.95  | 7.93E-07 |
| 208974_x_at | KPNB1    | 3837   | -0.07 | 11.53 | -4.94 | 8.20E-07 |
| 212698_s_at | 10-Sep   | 151011 | 0.20  | 4.57  | 4.93  | 8.63E-07 |
| 219650_at   | ERCC6L   | 54821  | -0.12 | 7.20  | -4.93 | 8.72E-07 |
| 204441_s_at | POLA2    | 23649  | -0.09 | 7.81  | -4.92 | 8.96E-07 |
| 201377_at   | UBAP2L   | 9898   | -0.07 | 10.09 | -4.92 | 8.96E-07 |

|             |          |        |       |       |       |          |
|-------------|----------|--------|-------|-------|-------|----------|
| 203665_at   | HMOX1    | 3162   | 0.32  | 3.78  | 4.92  | 9.02E-07 |
| 203232_s_at | ATXN1    | 6310   | 0.12  | 7.12  | 4.92  | 9.08E-07 |
| 46665_at    | SEMA4C   | 54910  | -0.18 | 9.80  | -4.91 | 9.39E-07 |
| 202923_s_at | GCLC     | 2729   | 0.08  | 9.07  | 4.91  | 9.42E-07 |
| 219258_at   | TIPIN    | 54962  | -0.09 | 9.29  | -4.91 | 9.56E-07 |
| 219084_at   | NSD1     | 64324  | -0.11 | 5.33  | -4.91 | 9.60E-07 |
| 218319_at   | PELI1    | 57162  | 0.13  | 4.58  | 4.90  | 9.97E-07 |
| 218581_at   | ABHD4    | 63874  | 0.13  | 3.88  | 4.90  | 1.00E-06 |
| 219990_at   | E2F8     | 79733  | -0.12 | 8.00  | -4.89 | 1.07E-06 |
| 204059_s_at | ME1      | 4199   | 0.06  | 11.01 | 4.89  | 1.08E-06 |
| 209336_at   | PWP2     | 5822   | -0.10 | 7.61  | -4.89 | 1.08E-06 |
| 217832_at   | SYNCRIP  | 10492  | -0.07 | 10.77 | -4.89 | 1.08E-06 |
| 209479_at   | CCDC28A  | 25901  | 0.14  | 6.86  | 4.88  | 1.10E-06 |
| 201041_s_at | DUSP1    | 1843   | 0.19  | 6.28  | 4.88  | 1.11E-06 |
| 219968_at   | ZNF589   | 51385  | -0.07 | 3.13  | -4.88 | 1.12E-06 |
| 212239_at   | PIK3R1   | 5295   | -0.16 | 8.88  | -4.88 | 1.13E-06 |
| 221658_s_at | IL21R    | 50615  | 0.09  | 2.27  | 4.88  | 1.15E-06 |
| 200631_s_at | SET      | 6418   | -0.04 | 11.91 | -4.87 | 1.17E-06 |
| 201170_s_at | BHLHE40  | 8553   | 0.21  | 6.08  | 4.87  | 1.19E-06 |
| 205807_s_at | TUFT1    | 7286   | 0.18  | 8.69  | 4.87  | 1.20E-06 |
| 217783_s_at | YPEL5    | 51646  | 0.15  | 7.79  | 4.86  | 1.23E-06 |
| 203827_at   | WIPI1    | 55062  | 0.19  | 5.61  | 4.84  | 1.39E-06 |
| 202153_s_at | NUP62    | 23636  | -0.11 | 8.87  | -4.83 | 1.41E-06 |
| 222343_at   | BCL2L11  | 10018  | 0.14  | 4.60  | 4.83  | 1.41E-06 |
| 217165_x_at | MT1F     | 4494   | 0.20  | 5.81  | 4.83  | 1.42E-06 |
| 218103_at   | FTSJ3    | 117246 | -0.06 | 9.87  | -4.83 | 1.42E-06 |
| 204510_at   | CDC7     | 8317   | -0.12 | 6.82  | -4.83 | 1.45E-06 |
| 219356_s_at | CHMP5    | 51510  | 0.06  | 10.63 | 4.81  | 1.55E-06 |
| 209345_s_at | PI4K2A   | 55361  | 0.15  | 5.47  | 4.81  | 1.59E-06 |
| 221489_s_at | SPRY4    | 81848  | 0.07  | 2.18  | 4.79  | 1.73E-06 |
| 209567_at   | RRS1     | 23212  | -0.13 | 10.14 | -4.78 | 1.85E-06 |
| 33304_at    | ISG20    | 3669   | 0.13  | 3.66  | 4.78  | 1.86E-06 |
| 221563_at   | DUSP10   | 11221  | 0.15  | 3.64  | 4.78  | 1.87E-06 |
| 218865_at   | MOSC1    | 64757  | -0.11 | 6.88  | -4.78 | 1.88E-06 |
| 212942_s_at | KIAA1199 | 57214  | 0.14  | 2.82  | 4.78  | 1.89E-06 |
| 221549_at   | GRWD1    | 83743  | -0.12 | 6.27  | -4.77 | 1.93E-06 |
| 219581_at   | TSEN2    | 80746  | -0.11 | 7.31  | -4.77 | 1.95E-06 |
| 204979_s_at | SH3BGR   | 6450   | 0.16  | 5.14  | 4.76  | 1.99E-06 |
| 214748_at   | N4BP2L2  | 10443  | 0.16  | 3.53  | 4.76  | 1.99E-06 |
| 200976_s_at | TAX1BP1  | 8887   | 0.07  | 9.72  | 4.76  | 2.01E-06 |
| 218001_at   | MRPS2    | 51116  | -0.08 | 9.94  | -4.76 | 2.06E-06 |
| 203153_at   | IFIT1    | 3434   | 0.25  | 2.69  | 4.75  | 2.09E-06 |
| 214988_s_at | SON      | 6651   | -0.06 | 10.81 | -4.75 | 2.11E-06 |
| 209610_s_at | SLC1A4   | 6509   | 0.17  | 5.73  | 4.75  | 2.11E-06 |
| 201397_at   | PHGDH    | 26227  | 0.10  | 7.58  | 4.75  | 2.16E-06 |

**signature genes (FDR<0.05)**

**FDR  
(<0.05)**

- 2.63E-11
- 7.07E-11
- 1.52E-09
- 1.73E-09
- 2.64E-09
- 6.36E-09
- 1.22E-08
- 1.51E-08
- 3.46E-08
- 1.14E-07
- 1.98E-07
- 2.95E-07
- 3.84E-07
- 4.42E-07
- 5.61E-07
- 5.94E-07
- 9.40E-07
- 2.71E-06
- 2.72E-06
- 3.26E-06
- 3.80E-06
- 4.04E-06
- 4.16E-06
- 4.28E-06
- 4.52E-06
- 4.58E-06
- 4.65E-06
- 5.32E-06
- 6.45E-06
- 7.03E-06
- 7.63E-06
- 9.07E-06
- 1.54E-05
- 1.98E-05
- 2.24E-05
- 2.34E-05
- 3.20E-05
- 3.55E-05
- 3.61E-05
- 3.74E-05
- 3.93E-05
- 4.13E-05
- 4.65E-05
- 5.70E-05
- 5.80E-05
- 6.49E-05

9.92E-05  
1.16E-04  
1.17E-04  
1.46E-04  
1.49E-04  
2.43E-04  
2.52E-04  
2.65E-04  
2.72E-04  
4.09E-04  
4.10E-04  
4.31E-04  
4.52E-04  
4.55E-04  
4.55E-04  
4.64E-04  
4.94E-04  
4.97E-04  
5.14E-04  
5.37E-04  
5.77E-04  
6.04E-04  
6.14E-04  
6.27E-04  
6.35E-04  
6.74E-04  
6.77E-04  
6.84E-04  
6.92E-04  
9.58E-04  
1.00E-03  
1.06E-03  
1.07E-03  
1.14E-03  
1.16E-03  
1.39E-03  
1.39E-03  
1.40E-03  
1.62E-03  
1.65E-03  
1.70E-03  
1.88E-03  
2.38E-03  
2.46E-03  
2.48E-03  
2.52E-03  
2.53E-03  
2.55E-03  
2.91E-03  
3.00E-03



3.44E-03  
3.54E-03  
3.67E-03  
3.68E-03  
4.06E-03  
4.36E-03  
4.70E-03  
4.71E-03  
4.74E-03  
4.80E-03  
4.85E-03  
4.96E-03  
5.11E-03  
5.23E-03  
5.29E-03  
5.31E-03  
5.32E-03  
5.39E-03  
6.39E-03  
6.42E-03  
6.54E-03  
6.80E-03  
7.04E-03  
8.11E-03  
8.65E-03  
8.96E-03  
9.04E-03  
9.49E-03  
9.52E-03  
9.91E-03  
1.03E-02  
1.05E-02  
1.07E-02  
1.07E-02  
1.09E-02  
1.11E-02  
1.21E-02  
1.25E-02  
1.36E-02  
1.38E-02  
1.58E-02  
1.58E-02  
1.71E-02  
1.75E-02  
1.77E-02  
1.83E-02  
1.92E-02  
1.94E-02  
2.00E-02  
2.00E-02

2.01E-02  
2.02E-02  
2.09E-02  
2.10E-02  
2.13E-02  
2.14E-02  
2.22E-02  
2.23E-02  
2.38E-02  
2.40E-02  
2.41E-02  
2.42E-02  
2.46E-02  
2.47E-02  
2.49E-02  
2.52E-02  
2.56E-02  
2.61E-02  
2.66E-02  
2.68E-02  
2.74E-02  
3.09E-02  
3.14E-02  
3.14E-02  
3.17E-02  
3.17E-02  
3.23E-02  
3.45E-02  
3.55E-02  
3.84E-02  
4.12E-02  
4.15E-02  
4.17E-02  
4.19E-02  
4.21E-02  
4.29E-02  
4.35E-02  
4.43E-02  
4.44E-02  
4.47E-02  
4.58E-02  
4.65E-02  
4.71E-02  
4.71E-02  
4.81E-02

**Supplementary Table S3: The 380 GO-annotated apoptotic genes, out of which 368 ge**

| <b>geneSymbol</b> | <b>type</b> | <b>hasMicroarrayData</b> |
|-------------------|-------------|--------------------------|
| ABL1              | pro         | YES                      |
| ACVR1B            | pro         | YES                      |
| ADAMTSL4          | pro         | YES                      |
| ADORA1            | pro         | YES                      |
| AIFM1             | pro         | YES                      |
| ALOX15B           | pro         | YES                      |
| APBB2             | both        | YES                      |
| APOE              | pro         | YES                      |
| B4GALT1           | pro         | YES                      |
| BAD               | pro         | YES                      |
| BAK1              | pro         | YES                      |
| BARD1             | both        | YES                      |
| BAX               | both        | YES                      |
| BBC3              | pro         | YES                      |
| BCL10             | both        | YES                      |
| BCL2L11           | pro         | YES                      |
| BCL2L13           | pro         | YES                      |
| BCL3              | both        | YES                      |
| BCL6              | both        | YES                      |
| BCLAF1            | pro         | YES                      |
| BID               | pro         | YES                      |
| BIK               | pro         | YES                      |
| BNIP1             | both        | YES                      |
| BNIP3             | both        | YES                      |
| BNIP3L            | both        | YES                      |
| BOK               | pro         | YES                      |
| BRCA1             | pro         | YES                      |
| BTK               | pro         | YES                      |
| C16orf5           | pro         | YES                      |
| CADM1             | pro         | YES                      |
| CASP10            | pro         | YES                      |
| CASP3             | both        | YES                      |
| CASP4             | pro         | YES                      |
| CASP6             | pro         | YES                      |
| CASP8AP2          | pro         | YES                      |
| CD2               | pro         | YES                      |
| CD24              | pro         | YES                      |
| CD27              | both        | YES                      |
| CD28              | both        | YES                      |
| CD38              | pro         | YES                      |
| CD5               | pro         | YES                      |
| CD70              | pro         | YES                      |
| CDK5              | pro         | YES                      |

|         |      |     |
|---------|------|-----|
| CDK5R1  | pro  | YES |
| CDKN1A  | both | YES |
| CEBPB   | both | YES |
| CEBPG   | pro  | YES |
| CFLAR   | both | YES |
| CHEK2   | pro  | YES |
| CIDEA   | pro  | YES |
| CIDEB   | pro  | YES |
| CIDEC   | pro  | YES |
| COL18A1 | pro  | YES |
| COL4A3  | pro  | YES |
| CRADD   | pro  | YES |
| CRTAM   | pro  | YES |
| CUL1    | pro  | YES |
| CUL2    | pro  | YES |
| CUL3    | pro  | YES |
| CUL4A   | pro  | YES |
| CUL5    | pro  | YES |
| DAP     | pro  | YES |
| DAP3    | pro  | YES |
| DAPK1   | pro  | YES |
| DAPK2   | pro  | YES |
| DAPK3   | pro  | YES |
| DAXX    | pro  | YES |
| DCC     | pro  | YES |
| DEDD    | pro  | YES |
| DIABLO  | pro  | YES |
| DNM2    | pro  | YES |
| DPF1    | pro  | YES |
| DPF2    | pro  | YES |
| DYRK2   | pro  | YES |
| EEF1E1  | pro  | YES |
| EI24    | pro  | YES |
| ERCC2   | pro  | YES |
| ERCC3   | pro  | YES |
| ERN1    | pro  | YES |
| ERN2    | pro  | YES |
| FADD    | pro  | YES |
| FAF1    | pro  | YES |
| FAS     | both | YES |
| FASLG   | pro  | YES |
| FASTK   | pro  | YES |
| FEM1B   | pro  | YES |
| FOXL2   | pro  | YES |
| FOXO3   | pro  | YES |
| GPX1    | pro  | YES |
| HD      | both | NO  |

|         |      |     |
|---------|------|-----|
| HIPK2   | pro  | YES |
| HRK     | both | YES |
| HTATIP2 | both | YES |
| IFNA2   | pro  | YES |
| IFNB1   | pro  | YES |
| IGFBP3  | pro  | YES |
| IHPK2   | pro  | NO  |
| IKBKG   | pro  | YES |
| IL18    | pro  | YES |
| IL19    | pro  | YES |
| INHA    | pro  | YES |
| INHBA   | pro  | YES |
| KNG1    | pro  | YES |
| LAG3    | pro  | YES |
| LALBA   | pro  | YES |
| LCK     | pro  | YES |
| LTA     | pro  | YES |
| LTB4R2  | pro  | YES |
| MAL     | pro  | YES |
| MAP3K10 | pro  | YES |
| MAP3K5  | pro  | YES |
| MAPK1   | pro  | YES |
| MBD4    | pro  | YES |
| MMP9    | pro  | YES |
| MSH6    | pro  | YES |
| MTCH1   | pro  | YES |
| MX1     | pro  | YES |
| MYC     | both | YES |
| NCR1    | pro  | YES |
| NDUFA13 | pro  | YES |
| NDUFS3  | pro  | YES |
| NF1     | pro  | YES |
| NGFR    | pro  | YES |
| NLRP1   | pro  | YES |
| NLRP3   | pro  | YES |
| NME3    | pro  | YES |
| NOTCH2  | both | YES |
| NOX5    | pro  | YES |
| NUDT2   | pro  | YES |
| NUPR1   | pro  | YES |
| PAWR    | pro  | YES |
| PCBP4   | pro  | YES |
| PDCD5   | pro  | YES |
| PDCD6   | pro  | YES |
| PDIA3   | pro  | YES |
| PLAGL1  | pro  | YES |
| PLAGL2  | pro  | YES |

|          |      |     |
|----------|------|-----|
| PLG      | pro  | YES |
| PMAIP1   | pro  | YES |
| PML      | pro  | YES |
| POU4F1   | pro  | NO  |
| PPP1R13B | pro  | YES |
| PPP2CA   | pro  | YES |
| PPP2R1A  | pro  | YES |
| PPP2R1B  | pro  | YES |
| PRKCA    | pro  | YES |
| PRKCE    | pro  | YES |
| PRKRA    | pro  | YES |
| PRODH    | pro  | YES |
| PSEN2    | pro  | YES |
| PTEN     | both | YES |
| PTH      | pro  | YES |
| PTPRC    | pro  | YES |
| PYCARD   | pro  | YES |
| PYHIN1   | pro  | YES |
| RAB27A   | pro  | YES |
| RAD9A    | pro  | YES |
| RARG     | pro  | YES |
| RIPK2    | pro  | YES |
| RNF7     | both | YES |
| RPS3A    | pro  | YES |
| RUNX3    | pro  | YES |
| S100B    | pro  | YES |
| SAP30BP  | pro  | YES |
| SART1    | pro  | YES |
| SCIN     | pro  | YES |
| SERINC3  | pro  | YES |
| SFN      | pro  | YES |
| SIPA1    | pro  | YES |
| SIVA1    | pro  | YES |
| SLAMF7   | pro  | YES |
| SLC19A1  | pro  | YES |
| SMNDC1   | pro  | YES |
| SOD1     | both | YES |
| SPN      | pro  | YES |
| SST      | pro  | YES |
| SSTR3    | pro  | YES |
| STK17A   | pro  | YES |
| STK17B   | pro  | YES |
| STK3     | pro  | YES |
| STK4     | pro  | YES |
| TBX5     | pro  | YES |
| TGFB2    | pro  | YES |
| TIA1     | pro  | YES |

|           |      |     |
|-----------|------|-----|
| TIAL1     | pro  | YES |
| TIMP3     | pro  | YES |
| TLR2      | pro  | YES |
| TNF       | both | YES |
| TNFRSF10B | pro  | YES |
| TNFRSF25  | pro  | YES |
| TNFRSF8   | pro  | YES |
| TNFRSF9   | pro  | YES |
| TNFSF10   | pro  | YES |
| TNFSF14   | pro  | YES |
| TNFSF8    | pro  | YES |
| TOP2A     | pro  | YES |
| TP53      | pro  | YES |
| TP53BP2   | pro  | YES |
| TP53I3    | pro  | YES |
| TP73      | pro  | YES |
| TP73L     | pro  | NO  |
| TPD52L1   | pro  | YES |
| TRADD     | pro  | YES |
| TRAF3     | pro  | YES |
| TRAIP     | pro  | YES |
| TUBB      | pro  | YES |
| TUBB2C    | pro  | YES |
| UNC13B    | pro  | YES |
| UTP11L    | pro  | YES |
| ZAK       | pro  | YES |
| ZNF443    | pro  | YES |
| AATF      | anti | YES |
| ACCN1     | anti | YES |
| ACVR1     | anti | YES |
| AGT       | anti | YES |
| AKT1      | anti | YES |
| ALB       | anti | YES |
| ALOX12    | anti | YES |
| ANGPTL4   | anti | YES |
| ANXA1     | anti | YES |
| ANXA4     | anti | YES |
| ANXA5     | anti | YES |
| API5      | anti | YES |
| APIP      | anti | YES |
| ARHGDI1A  | anti | YES |
| ATF5      | anti | YES |
| AVEN      | anti | YES |
| AZU1      | anti | YES |
| BAG1      | anti | YES |
| BAG3      | anti | YES |
| BAG4      | anti | YES |

|         |      |     |
|---------|------|-----|
| BAPX1   | anti | NO  |
| BCL2    | anti | YES |
| BCL2A1  | anti | YES |
| BCL2L1  | anti | YES |
| BCL2L10 | anti | YES |
| BCL2L2  | anti | YES |
| BDNF    | anti | YES |
| BECN1   | anti | YES |
| BFAR    | anti | YES |
| BIRC2   | anti | YES |
| BIRC3   | anti | YES |
| BIRC4   | anti | NO  |
| BIRC5   | anti | YES |
| BIRC7   | anti | YES |
| BNIP2   | anti | YES |
| BRAF    | anti | NO  |
| BRE     | anti | YES |
| CASP2   | anti | YES |
| CBX4    | anti | YES |
| CCL2    | anti | YES |
| CD40LG  | anti | YES |
| CD74    | anti | YES |
| CDC2    | anti | YES |
| CFDP1   | anti | YES |
| CFL1    | anti | YES |
| CIAPIN1 | anti | YES |
| CLCF1   | anti | YES |
| CLN3    | anti | YES |
| CRYAA   | anti | YES |
| CRYAB   | anti | YES |
| CSF2    | anti | YES |
| DAD1    | anti | YES |
| DDAH2   | anti | YES |
| DHCR24  | anti | YES |
| EEF1A2  | anti | YES |
| ERC1    | anti | YES |
| FAIM    | anti | YES |
| FAIM2   | anti | YES |
| FAIM3   | anti | YES |
| FCER1G  | anti | YES |
| FGF4    | anti | YES |
| FOXO1   | anti | YES |
| GCLC    | anti | YES |
| GCLM    | anti | YES |
| GDNF    | anti | YES |
| GLO1    | anti | YES |
| GSK3B   | anti | YES |



|          |      |     |
|----------|------|-----|
| GSTP1    | anti | YES |
| HBXIP    | anti | YES |
| HDAC1    | anti | YES |
| HDAC3    | anti | YES |
| HIPK3    | anti | YES |
| HMGB1    | anti | YES |
| HSP90B1  | anti | YES |
| HSPA1A   | anti | NO  |
| HSPA1B   | anti | NO  |
| HSPA9    | anti | YES |
| HSPB1    | anti | YES |
| IER3     | anti | YES |
| IFI6     | anti | YES |
| IGF1R    | anti | YES |
| IL10     | anti | YES |
| IL1A     | anti | YES |
| IL2      | anti | YES |
| IL2RB    | anti | YES |
| IL3      | anti | YES |
| IL4      | anti | YES |
| IL6      | anti | YES |
| IL7      | anti | YES |
| KRT18    | anti | YES |
| LIG4     | anti | YES |
| MALT1    | anti | YES |
| MAPK8    | anti | YES |
| MAPK8IP2 | anti | YES |
| MCL1     | anti | YES |
| MIF      | anti | NO  |
| MKL1     | anti | YES |
| MPO      | anti | YES |
| MSH2     | anti | YES |
| MTL5     | anti | YES |
| MYBL2    | anti | YES |
| NFKB1    | anti | YES |
| NME1     | anti | NO  |
| NME5     | anti | YES |
| NME6     | anti | YES |
| NOL3     | anti | YES |
| NPM1     | anti | YES |
| NRG2     | anti | YES |
| NTF3     | anti | YES |
| NUP62    | anti | YES |
| OPA1     | anti | YES |
| PAK7     | anti | YES |
| PAX7     | anti | YES |
| PEA15    | anti | YES |

|           |      |     |
|-----------|------|-----|
| PIK3CA    | anti | YES |
| PIK3CG    | anti | YES |
| PIK3R2    | anti | YES |
| PIM1      | anti | YES |
| PIM2      | anti | YES |
| POGK      | anti | YES |
| POLB      | anti | YES |
| PPT1      | anti | YES |
| PRDX2     | anti | YES |
| PRKAA1    | anti | YES |
| PRKCZ     | anti | YES |
| PRLR      | anti | YES |
| PROC      | anti | YES |
| PROP1     | anti | YES |
| PSEN1     | anti | YES |
| RASA1     | anti | YES |
| RBKS      | anti | YES |
| RELA      | anti | YES |
| ROCK1     | anti | YES |
| RTN4      | anti | YES |
| SCG2      | anti | YES |
| SEMA4D    | anti | YES |
| SERPINB2  | anti | YES |
| SERPINB9  | anti | YES |
| SFRP1     | anti | YES |
| SH3GLB1   | anti | YES |
| SMO       | anti | YES |
| SNCA      | anti | YES |
| SOCS2     | anti | YES |
| SOCS3     | anti | YES |
| SON       | anti | YES |
| SPHK1     | anti | YES |
| SPHK2     | anti | YES |
| SPP1      | anti | YES |
| STAMBP    | anti | YES |
| STAT5A    | anti | YES |
| STAT5B    | anti | YES |
| TAX1BP1   | anti | YES |
| TBX3      | anti | YES |
| TEGT      | anti | NO  |
| TGFB1     | anti | YES |
| TNFAIP3   | anti | YES |
| TNFAIP8   | anti | YES |
| TNFRSF10D | anti | YES |
| TNFSF18   | anti | YES |
| TPT1      | anti | YES |
| TRIAP1    | anti | YES |

|         |      |     |
|---------|------|-----|
| TSC22D3 | anti | YES |
| TXNDC1  | anti | YES |
| TXNDC5  | anti | YES |
| VEGFA   | anti | YES |
| VHL     | anti | YES |
| XRCC4   | anti | YES |
| YWHAH   | anti | YES |
| YWHAZ   | anti | YES |

**nes have probe sets in CMAP data**

**Supplementary Table S4: All interactions from interaction component of NCBI**

| <b>13 Selected Drug-Responsive Genes</b> | <b>Product of Selected Genes</b> | <b>Interactant</b>             | <b>Interactant geneSymbol</b> |
|------------------------------------------|----------------------------------|--------------------------------|-------------------------------|
| BCL2L11                                  | NC_000002.9                      | <a href="#">NP_963853.1</a>    | <a href="#">FOXO3</a>         |
| BCL2L11                                  | NP_006529.1                      | <a href="#">NP_000624.1</a>    | <a href="#">BCL2</a>          |
| BCL2L11                                  | NP_006529.1                      | <a href="#">NP_612815.1</a>    | <a href="#">BCL2L1</a>        |
| BCL2L11                                  | NP_006529.1                      | <a href="#">NP_004041.1</a>    | <a href="#">BCL2L2</a>        |
| BCL2L11                                  | O43521                           | <a href="#">P31749</a>         | <a href="#">AKT1</a>          |
| BCL2L11                                  | O43521                           | <a href="#">P10415</a>         | <a href="#">BCL2</a>          |
| BCL2L11                                  | O43521                           | <a href="#">Q16548</a>         | <a href="#">BCL2A1</a>        |
| BCL2L11                                  | O43521                           | <a href="#">Q07817</a>         | <a href="#">BCL2L1</a>        |
| BCL2L11                                  | O43521                           | <a href="#">O43521</a>         | <a href="#">BCL2L11</a>       |
| BCL2L11                                  | O43521                           | <a href="#">Q92843</a>         | <a href="#">BCL2L2</a>        |
| BCL2L11                                  | O43521                           | <a href="#">P63167</a>         | <a href="#">DYNLL1</a>        |
| BCL2L11                                  | O43521                           | <a href="#">P53779</a>         | <a href="#">MAPK10</a>        |
| BCL2L11                                  | O43521                           | <a href="#">P45983</a>         | <a href="#">MAPK8</a>         |
| BCL2L11                                  | O43521                           | <a href="#">P45984</a>         | <a href="#">MAPK9</a>         |
| BCL2L11                                  | O43521                           | <a href="#">Q07820</a>         | <a href="#">MCL1</a>          |
| BCL2L11                                  | O43521                           | Ring finger and KH don         | <a href="#">MEX3D</a>         |
| BCL2L11                                  | O43521                           | <a href="#">P21796</a>         | <a href="#">VDAC1</a>         |
| BCL2L11                                  | O43521                           | <a href="#">P31946</a>         | <a href="#">YWHAB</a>         |
| BCL2L11                                  | BioGRID:115335                   | <a href="#">BioGRID:107068</a> | <a href="#">BCL2</a>          |
| BCL2L11                                  | BioGRID:115335                   | <a href="#">BioGRID:107069</a> | <a href="#">BCL2A1</a>        |
| BCL2L11                                  |                                  | <a href="#">NP_612815.1</a>    | <a href="#">BCL2L1</a>        |
| BCL2L11                                  | BioGRID:115335                   | <a href="#">BioGRID:107070</a> | <a href="#">BCL2L1</a>        |
| BCL2L11                                  | BioGRID:115335                   | <a href="#">BioGRID:107071</a> | <a href="#">BCL2L2</a>        |
| BCL2L11                                  | BioGRID:115335                   | <a href="#">BioGRID:107160</a> | <a href="#">BTK</a>           |
| BCL2L11                                  | BioGRID:115335                   | <a href="#">BioGRID:114206</a> | <a href="#">DYNLL1</a>        |
| BCL2L11                                  | BioGRID:115335                   | <a href="#">BioGRID:126680</a> | <a href="#">DYNLL2</a>        |
| BCL2L11                                  | BioGRID:115335                   | <a href="#">BioGRID:109224</a> | <a href="#">GTF2I</a>         |
| BCL2L11                                  | BioGRID:115335                   | <a href="#">BioGRID:110338</a> | <a href="#">MCL1</a>          |
| BCL2L11                                  | BioGRID:115335                   | <a href="#">BioGRID:112482</a> | <a href="#">SMARCB1</a>       |
| BCL2L11                                  | BioGRID:115335                   | <a href="#">BioGRID:113164</a> | <a href="#">UBC</a>           |
| BCL2L11                                  | BioGRID:115335                   | <a href="#">BioGRID:113259</a> | <a href="#">VDAC1</a>         |
| BCL2L11                                  | BioGRID:115335                   | <a href="#">BioGRID:249746</a> | <a href="#">Vdac1</a>         |
| BNIP3L                                   | NT_023666.17                     | <a href="#">NP_004371.1</a>    | <a href="#">CREBBP</a>        |
| BNIP3L                                   | NT_023666.17                     | <a href="#">NP_000537.2</a>    | <a href="#">TP53</a>          |
| BNIP3L                                   | O60238                           | <a href="#">P10415</a>         | <a href="#">BCL2</a>          |
| BNIP3L                                   | O60238                           | <a href="#">Q07817</a>         | <a href="#">BCL2L1</a>        |
| BNIP3L                                   | O60238                           | <a href="#">Q12983</a>         | <a href="#">BNIP3</a>         |
| BNIP3L                                   | O60238                           | <a href="#">O60238</a>         | <a href="#">BNIP3L</a>        |
| BNIP3L                                   | O60238                           | <a href="#">Q9P104</a>         | <a href="#">DOK5</a>          |
| BNIP3L                                   | O60238                           | <a href="#">Q01844</a>         | <a href="#">EWSR1</a>         |
| BNIP3L                                   | O60238                           | <a href="#">Q6NUQ1</a>         | <a href="#">RINT1</a>         |
| BNIP3L                                   | O60238                           | Dudulin 2                      | <a href="#">STEAP3</a>        |
| BNIP3L                                   | O60238                           | <a href="#">P17152</a>         | <a href="#">TMEM11</a>        |
| BNIP3L                                   | BioGRID:107133                   | <a href="#">BioGRID:107068</a> | <a href="#">BCL2</a>          |

|        |                |                                |                         |
|--------|----------------|--------------------------------|-------------------------|
| BNIP3L | BioGRID:107133 | <a href="#">BioGRID:107132</a> | <a href="#">BNIP3</a>   |
| BNIP3L | BioGRID:107133 | <a href="#">BioGRID:107133</a> | <a href="#">BNIP3L</a>  |
| BNIP3L | BioGRID:107133 | <a href="#">BioGRID:120926</a> | <a href="#">DOK5</a>    |
| BNIP3L | BioGRID:107133 | <a href="#">BioGRID:108431</a> | <a href="#">EWSR1</a>   |
| BNIP3L | BioGRID:107133 | <a href="#">BioGRID:120533</a> | <a href="#">STEAP3</a>  |
| BNIP3L | BioGRID:107133 | <a href="#">BioGRID:114361</a> | <a href="#">TMEM11</a>  |
| MSH6   | NP_000170.1    | <a href="#">NP_009227.1</a>    | <a href="#">BRCA1</a>   |
| MSH6   | NP_000170.1    | <a href="#">NP_000242.1</a>    | <a href="#">MSH2</a>    |
| MSH6   | NP_000170.1    | <a href="#">NP_000242.1</a>    | <a href="#">MSH2</a>    |
| MSH6   | NP_000170.1    | <a href="#">NP_036354.1</a>    | <a href="#">MUTYH</a>   |
| MSH6   | NP_000170.1    | <a href="#">NP_002583.1</a>    | <a href="#">PCNA</a>    |
| MSH6   | P52701         | <a href="#">Q92793</a>         | <a href="#">CREBBP</a>  |
| MSH6   | P52701         | <a href="#">Q09472</a>         | <a href="#">EP300</a>   |
| MSH6   | P52701         | <a href="#">P43246</a>         | <a href="#">MSH2</a>    |
| MSH6   | P52701         | <a href="#">Q9UIF7</a>         | <a href="#">MUTYH</a>   |
| MSH6   | P52701         | <a href="#">P12004</a>         | <a href="#">PCNA</a>    |
| MSH6   | BioGRID:109211 | <a href="#">BioGRID:106823</a> | <a href="#">AIRE</a>    |
| MSH6   | BioGRID:109211 | <a href="#">BioGRID:106962</a> | <a href="#">ATM</a>     |
| MSH6   | BioGRID:109211 | <a href="#">BioGRID:107027</a> | <a href="#">ATR</a>     |
| MSH6   | BioGRID:109211 | <a href="#">BioGRID:107056</a> | <a href="#">BARD1</a>   |
| MSH6   | BioGRID:109211 | <a href="#">BioGRID:107110</a> | <a href="#">BLM</a>     |
| MSH6   | BioGRID:109211 | <a href="#">BioGRID:107140</a> | <a href="#">BRCA1</a>   |
| MSH6   | BioGRID:109211 | <a href="#">BioGRID:107287</a> | <a href="#">CASP4</a>   |
| MSH6   | BioGRID:109211 | <a href="#">BioGRID:107536</a> | <a href="#">CHEK1</a>   |
| MSH6   | BioGRID:109211 | <a href="#">BioGRID:122015</a> | <a href="#">CLSPN</a>   |
| MSH6   | BioGRID:109211 | <a href="#">BioGRID:108403</a> | <a href="#">ESR1</a>    |
| MSH6   | BioGRID:109211 | <a href="#">BioGRID:110438</a> | <a href="#">MLH1</a>    |
| MSH6   | BioGRID:109211 | <a href="#">BioGRID:116134</a> | <a href="#">MORF4L1</a> |
| MSH6   | BioGRID:109211 | <a href="#">BioGRID:110501</a> | <a href="#">MRE11A</a>  |
| MSH6   | BioGRID:109211 | <a href="#">BioGRID:110573</a> | <a href="#">MSH2</a>    |
| MSH6   | BioGRID:109211 | <a href="#">BioGRID:110694</a> | <a href="#">MYC</a>     |
| MSH6   | BioGRID:109211 | <a href="#">BioGRID:110763</a> | <a href="#">NBN</a>     |
| MSH6   | BioGRID:109211 | <a href="#">BioGRID:111142</a> | <a href="#">PCNA</a>    |
| MSH6   | BioGRID:109211 | <a href="#">BioGRID:111404</a> | <a href="#">PMS2</a>    |
| MSH6   | BioGRID:109211 | <a href="#">BioGRID:111576</a> | <a href="#">PRKCZ</a>   |
| MSH6   | BioGRID:109211 | <a href="#">BioGRID:115417</a> | <a href="#">RAD50</a>   |
| MSH6   | BioGRID:109211 | <a href="#">BioGRID:111913</a> | <a href="#">RFC1</a>    |
| MSH6   | BioGRID:109211 | <a href="#">BioGRID:113871</a> | <a href="#">SMC1A</a>   |
| MSH6   | BioGRID:109211 | <a href="#">BioGRID:116256</a> | <a href="#">TOPBP1</a>  |
| MSH6   | BioGRID:109211 | <a href="#">BioGRID:113164</a> | <a href="#">UBC</a>     |
| NUP62  | NP_036478.2    | <a href="#">AAC34298.1</a>     | <a href="#">DDX3X</a>   |
| NUP62  | P37198         | <a href="#">Q9Y3C0</a>         | <a href="#">CCDC53</a>  |
| NUP62  | P37198         | <a href="#">O00571</a>         | <a href="#">DDX3X</a>   |
| NUP62  | P37198         | <a href="#">O60941</a>         | <a href="#">DTNB</a>    |
| NUP62  | P37198         | <a href="#">Q9H8Y8</a>         | <a href="#">GORASP2</a> |
| NUP62  | P37198         | <a href="#">P29084</a>         | <a href="#">GTF2E2</a>  |
| NUP62  | P37198         | <a href="#">Q03933</a>         | <a href="#">HSF2</a>    |
| NUP62  | P37198         | <a href="#">Q13123</a>         | <a href="#">IK</a>      |
| NUP62  | P37198         | <a href="#">O00410</a>         | <a href="#">IPO5</a>    |
| NUP62  | P37198         | <a href="#">Q14974</a>         | <a href="#">KPNB1</a>   |

|        |                |                                |                         |
|--------|----------------|--------------------------------|-------------------------|
| NUP62  | P37198         | <a href="#">P49790</a>         | <a href="#">NUP153</a>  |
| NUP62  | P37198         | <a href="#">Q7Z3B4</a>         | <a href="#">NUP54</a>   |
| NUP62  | P37198         | <a href="#">P37198</a>         | <a href="#">NUP62</a>   |
| NUP62  | P37198         | <a href="#">P52948</a>         | <a href="#">NUP98</a>   |
| NUP62  | P37198         | <a href="#">Q9BVL2</a>         | <a href="#">NUPL1</a>   |
| NUP62  | P37198         | <a href="#">P61970</a>         | <a href="#">NUTF2</a>   |
| NUP62  | P37198         | <a href="#">Q9UBU9</a>         | <a href="#">NXF1</a>    |
| NUP62  | P37198         | <a href="#">Q9GZY0</a>         | <a href="#">NXF2</a>    |
| NUP62  | P37198         | <a href="#">P40425</a>         | <a href="#">PBX2</a>    |
| NUP62  | P37198         | <a href="#">P06454</a>         | <a href="#">PTMA</a>    |
| NUP62  | P37198         | <a href="#">P49792</a>         | <a href="#">RANBP2</a>  |
| NUP62  | P37198         | <a href="#">Q9NVV9</a>         | <a href="#">THAP1</a>   |
| NUP62  | P37198         | <a href="#">Q13114</a>         | <a href="#">TRAF3</a>   |
| NUP62  | P37198         | <a href="#">O14980</a>         | <a href="#">XPO1</a>    |
| NUP62  | P37198         | <a href="#">Q96QU8</a>         | <a href="#">XPO6</a>    |
| NUP62  | BioGRID:117165 | <a href="#">BioGRID:119225</a> | <a href="#">CCDC53</a>  |
| NUP62  | BioGRID:117165 | <a href="#">BioGRID:108171</a> | <a href="#">DTNB</a>    |
| NUP62  | BioGRID:117165 | <a href="#">BioGRID:115448</a> | <a href="#">G3BP1</a>   |
| NUP62  | BioGRID:117165 | <a href="#">BioGRID:115237</a> | <a href="#">G3BP2</a>   |
| NUP62  | BioGRID:117165 | <a href="#">BioGRID:117479</a> | <a href="#">GORASP2</a> |
| NUP62  | BioGRID:117165 | <a href="#">BioGRID:109531</a> | <a href="#">HSF2</a>    |
| NUP62  | BioGRID:117165 | <a href="#">BioGRID:109766</a> | <a href="#">IK</a>      |
| NUP62  | BioGRID:117165 | <a href="#">BioGRID:110034</a> | <a href="#">KPNA1</a>   |
| NUP62  | BioGRID:117165 | <a href="#">BioGRID:110035</a> | <a href="#">KPNB1</a>   |
| NUP62  | BioGRID:117165 | <a href="#">BioGRID:110865</a> | <a href="#">NFX1</a>    |
| NUP62  | BioGRID:117165 | <a href="#">BioGRID:119759</a> | <a href="#">NUP54</a>   |
| NUP62  | BioGRID:117165 | <a href="#">BioGRID:115499</a> | <a href="#">NUTF2</a>   |
| NUP62  | BioGRID:117165 | <a href="#">BioGRID:121026</a> | <a href="#">NXF2</a>    |
| NUP62  | BioGRID:117165 | <a href="#">BioGRID:114049</a> | <a href="#">OGT</a>     |
| NUP62  | BioGRID:117165 | <a href="#">BioGRID:114054</a> | <a href="#">RAE1</a>    |
| NUP62  | BioGRID:117165 | <a href="#">BioGRID:120448</a> | <a href="#">THAP1</a>   |
| NUP62  | BioGRID:117165 | <a href="#">BioGRID:113039</a> | <a href="#">TRAF3</a>   |
| NUP62  | BioGRID:117165 | <a href="#">BioGRID:113348</a> | <a href="#">XPO1</a>    |
| NUP62  | BioGRID:117165 | <a href="#">BioGRID:116821</a> | <a href="#">XPO6</a>    |
| PMAIP1 | NC_000018.8    | <a href="#">NP_002458.1</a>    | <a href="#">MYC</a>     |
| PMAIP1 | NC_000018.8    | <a href="#">NP_003434.1</a>    | <a href="#">ZBTB17</a>  |
| PMAIP1 | NP_066950.1    | <a href="#">NP_004040.1</a>    | <a href="#">BCL2A1</a>  |
| PMAIP1 | Q13794         | <a href="#">Q07814</a>         | <a href="#">BAX</a>     |
| PMAIP1 | Q13794         | <a href="#">P10415</a>         | <a href="#">BCL2</a>    |
| PMAIP1 | Q13794         | <a href="#">Q16548</a>         | <a href="#">BCL2A1</a>  |
| PMAIP1 | Q13794         | <a href="#">Q07817</a>         | <a href="#">BCL2L1</a>  |
| PMAIP1 | Q13794         | <a href="#">Q07820</a>         | <a href="#">MCL1</a>    |
| PMAIP1 | Q13794         | <a href="#">P02775</a>         | <a href="#">PPBP</a>    |
| PMAIP1 | Q13794         | <a href="#">Q05516</a>         | <a href="#">ZBTB16</a>  |
| PMAIP1 | BioGRID:111379 | <a href="#">BioGRID:107057</a> | <a href="#">BAX</a>     |
| PMAIP1 | BioGRID:111379 | <a href="#">BioGRID:107068</a> | <a href="#">BCL2</a>    |
| PMAIP1 | BioGRID:111379 | <a href="#">BioGRID:107069</a> | <a href="#">BCL2A1</a>  |
| PMAIP1 | BioGRID:111379 | <a href="#">BioGRID:107070</a> | <a href="#">BCL2L1</a>  |
| PMAIP1 | BioGRID:111379 | <a href="#">BioGRID:107071</a> | <a href="#">BCL2L2</a>  |
| PMAIP1 | BioGRID:111379 | <a href="#">BioGRID:110338</a> | <a href="#">MCL1</a>    |

|         |                |                                |                         |
|---------|----------------|--------------------------------|-------------------------|
| PMAIP1  | BioGRID:111379 | <a href="#">BioGRID:113498</a> | <a href="#">ZBTB16</a>  |
| SERINC3 | BioGRID:116155 | <a href="#">BioGRID:116145</a> | <a href="#">KDELR1</a>  |
| SERINC3 | BioGRID:116155 | <a href="#">BioGRID:116204</a> | <a href="#">KDELR2</a>  |
| SERINC3 | BioGRID:116155 | <a href="#">BioGRID:116459</a> | <a href="#">PHB2</a>    |
| SERINC3 | BioGRID:116155 | <a href="#">BioGRID:119570</a> | <a href="#">PTPLAD1</a> |
| SERINC3 | BioGRID:116155 | <a href="#">BioGRID:112454</a> | <a href="#">SLC16A1</a> |
| SERINC3 | BioGRID:116155 | <a href="#">BioGRID:112703</a> | <a href="#">SURF4</a>   |
| SERINC3 | BioGRID:116155 | <a href="#">BioGRID:113260</a> | <a href="#">VDAC2</a>   |
| SERINC3 | BioGRID:116155 | <a href="#">BioGRID:121574</a> | <a href="#">XPO5</a>    |
| SON     | P18583         | <a href="#">Q75400</a>         | <a href="#">PRPF40A</a> |
| SON     | P18583         | <a href="#">Q8TAD8</a>         | <a href="#">SNIP1</a>   |
| SON     | P18583         | <a href="#">Q15654</a>         | <a href="#">TRIP6</a>   |
| SON     | P18583         | <a href="#">P31946</a>         | <a href="#">YWHAB</a>   |
| SON     | P18583         | <a href="#">P61981</a>         | <a href="#">YWHAG</a>   |
| SON     | BioGRID:112534 | <a href="#">BioGRID:113364</a> | <a href="#">YWHAG</a>   |
| TAX1BP1 | NP_006015.4    | <a href="#">NP_821074.1</a>    | <a href="#">STARD13</a> |
| TAX1BP1 | Q86VP1         | <a href="#">Q07960</a>         | <a href="#">ARHGAP1</a> |
| TAX1BP1 | Q86VP1         | <a href="#">Q9Y3C5</a>         | <a href="#">RNF11</a>   |
| TAX1BP1 | Q86VP1         | <a href="#">Q9Y3M8</a>         | <a href="#">STARD13</a> |
| TAX1BP1 | Q86VP1         | <a href="#">Q86VP1</a>         | <a href="#">TAX1BP1</a> |
| TAX1BP1 | Q86VP1         | <a href="#">Q9HA65</a>         | <a href="#">TBC1D17</a> |
| TAX1BP1 | Q86VP1         | <a href="#">P21580</a>         | <a href="#">TNFAIP3</a> |
| TAX1BP1 | Q86VP1         | <a href="#">Q9Y4K3</a>         | <a href="#">TRAF6</a>   |
| TAX1BP1 | BioGRID:114405 | <a href="#">BioGRID:114274</a> | <a href="#">RIPK1</a>   |
| TAX1BP1 | BioGRID:114405 | <a href="#">BioGRID:117941</a> | <a href="#">RNF11</a>   |
| TAX1BP1 | BioGRID:114405 | <a href="#">BioGRID:124744</a> | <a href="#">STARD13</a> |
| TAX1BP1 | BioGRID:114405 | <a href="#">BioGRID:122849</a> | <a href="#">TBC1D17</a> |
| TAX1BP1 | BioGRID:114405 | <a href="#">BioGRID:112983</a> | <a href="#">TNFAIP3</a> |
| TAX1BP1 | BioGRID:114405 | <a href="#">BioGRID:113041</a> | <a href="#">TRAF6</a>   |
| TNFAIP3 | NC_000006.9    | <a href="#">Q92750</a>         | <a href="#">TAF4B</a>   |
| TNFAIP3 | NP_006281.1    | <a href="#">NP_003795.1</a>    | <a href="#">RIPK1</a>   |
| TNFAIP3 | NP_006281.1    |                                | <a href="#">TICAM1</a>  |
| TNFAIP3 | NP_006281.1    | <a href="#">NP_005998.1</a>    | <a href="#">ZFAND5</a>  |
| TNFAIP3 | P21580         | <a href="#">O15111</a>         | <a href="#">CHUK</a>    |
| TNFAIP3 | P21580         | <a href="#">O14920</a>         | <a href="#">IKBKB</a>   |
| TNFAIP3 | P21580         | <a href="#">Q9Y6K9</a>         | <a href="#">IKBKG</a>   |
| TNFAIP3 | P21580         | <a href="#">Q13571</a>         | <a href="#">LAPTM5</a>  |
| TNFAIP3 | P21580         | <a href="#">Q13546</a>         | <a href="#">RIPK1</a>   |
| TNFAIP3 | P21580         | <a href="#">Q9Y3C5</a>         | <a href="#">RNF11</a>   |
| TNFAIP3 | P21580         | <a href="#">Q86VP1</a>         | <a href="#">TAX1BP1</a> |
| TNFAIP3 | P21580         | Toll-like receptor adapt       | <a href="#">TICAM1</a>  |
| TNFAIP3 | P21580         | <a href="#">P21580</a>         | <a href="#">TNFAIP3</a> |
| TNFAIP3 | P21580         | <a href="#">Q15025</a>         | <a href="#">TNIP1</a>   |
| TNFAIP3 | P21580         | TNFAIP3 interacting pr         | <a href="#">TNIP2</a>   |
| TNFAIP3 | P21580         | <a href="#">Q13077</a>         | <a href="#">TRAF1</a>   |
| TNFAIP3 | P21580         | <a href="#">Q12933</a>         | <a href="#">TRAF2</a>   |
| TNFAIP3 | P21580         | <a href="#">Q9Y4K3</a>         | <a href="#">TRAF6</a>   |
| TNFAIP3 | P21580         | <a href="#">P31946</a>         | <a href="#">YWHAB</a>   |
| TNFAIP3 | P21580         | <a href="#">P62258</a>         | <a href="#">YWHAE</a>   |
| TNFAIP3 | P21580         | <a href="#">P61981</a>         | <a href="#">YWHAG</a>   |



|         |                |                                |                          |
|---------|----------------|--------------------------------|--------------------------|
| TNFAIP3 | P21580         | <a href="#">Q04917</a>         | <a href="#">YWHAH</a>    |
| TNFAIP3 | P21580         | <a href="#">P63104</a>         | <a href="#">YWHAZ</a>    |
| TNFAIP3 | P21580         | <a href="#">O76080</a>         | <a href="#">ZFAND5</a>   |
| TNFAIP3 | BioGRID:112983 | <a href="#">BioGRID:106725</a> | <a href="#">ALDH9A1</a>  |
| TNFAIP3 | BioGRID:112983 | <a href="#">BioGRID:107291</a> | <a href="#">CASP8</a>    |
| TNFAIP3 | BioGRID:112983 | <a href="#">BioGRID:107569</a> | <a href="#">CHUK</a>     |
| TNFAIP3 | BioGRID:112983 | <a href="#">BioGRID:116534</a> | <a href="#">CNKSR2</a>   |
| TNFAIP3 | BioGRID:112983 | <a href="#">BioGRID:117657</a> | <a href="#">FBXO3</a>    |
| TNFAIP3 | BioGRID:112983 | <a href="#">BioGRID:108993</a> | <a href="#">GLDC</a>     |
| TNFAIP3 | BioGRID:112983 | <a href="#">BioGRID:109767</a> | <a href="#">IKBK</a>     |
| TNFAIP3 | BioGRID:112983 | <a href="#">BioGRID:114089</a> | <a href="#">IKBK</a>     |
| TNFAIP3 | BioGRID:112983 | <a href="#">BioGRID:110030</a> | <a href="#">KIF11</a>    |
| TNFAIP3 | BioGRID:112983 | <a href="#">BioGRID:110110</a> | <a href="#">LAMP1</a>    |
| TNFAIP3 | BioGRID:112983 | <a href="#">BioGRID:121540</a> | <a href="#">LRRC47</a>   |
| TNFAIP3 | BioGRID:112983 | <a href="#">BioGRID:110343</a> | <a href="#">MCM6</a>     |
| TNFAIP3 | BioGRID:112983 | <a href="#">BioGRID:110799</a> | <a href="#">NDUFS1</a>   |
| TNFAIP3 | BioGRID:112983 | <a href="#">BioGRID:111511</a> | <a href="#">PPP2R1B</a>  |
| TNFAIP3 | BioGRID:112983 | <a href="#">BioGRID:120579</a> | <a href="#">PPP6R3</a>   |
| TNFAIP3 | BioGRID:112983 | <a href="#">BioGRID:111855</a> | <a href="#">RARRES3</a>  |
| TNFAIP3 | BioGRID:112983 | <a href="#">BioGRID:114274</a> | <a href="#">RIPK1</a>    |
| TNFAIP3 | BioGRID:112983 | <a href="#">BioGRID:117941</a> | <a href="#">RNF11</a>    |
| TNFAIP3 | BioGRID:112983 | <a href="#">BioGRID:111977</a> | <a href="#">RNH1</a>     |
| TNFAIP3 | BioGRID:112983 | <a href="#">BioGRID:114405</a> | <a href="#">TAX1BP1</a>  |
| TNFAIP3 | BioGRID:112983 | <a href="#">BioGRID:118878</a> | <a href="#">TBK1</a>     |
| TNFAIP3 | BioGRID:112983 | <a href="#">BioGRID:112983</a> | <a href="#">TNFAIP3</a>  |
| TNFAIP3 | BioGRID:112983 | <a href="#">BioGRID:115602</a> | <a href="#">TNIP1</a>    |
| TNFAIP3 | BioGRID:112983 | <a href="#">BioGRID:113037</a> | <a href="#">TRAF1</a>    |
| TNFAIP3 | BioGRID:112983 | <a href="#">BioGRID:113038</a> | <a href="#">TRAF2</a>    |
| TNFAIP3 | BioGRID:112983 | <a href="#">BioGRID:113041</a> | <a href="#">TRAF6</a>    |
| TNFAIP3 | BioGRID:112983 | <a href="#">BioGRID:113361</a> | <a href="#">YWHA</a>     |
| TNFAIP3 | BioGRID:112983 | <a href="#">BioGRID:113363</a> | <a href="#">YWHA</a>     |
| TNFAIP3 | BioGRID:112983 | <a href="#">BioGRID:113364</a> | <a href="#">YWHA</a>     |
| TNFAIP3 | BioGRID:112983 | <a href="#">BioGRID:113365</a> | <a href="#">YWHA</a>     |
| TNFAIP3 | BioGRID:112983 | <a href="#">BioGRID:113366</a> | <a href="#">YWHA</a>     |
| TUBB    | P07437         | <a href="#">P04075</a>         | <a href="#">ALDOA</a>    |
| TUBB    | P07437         | <a href="#">Q9NVJ2</a>         | <a href="#">ARL8B</a>    |
| TUBB    | P07437         | <a href="#">P15291</a>         | <a href="#">B4GALT1</a>  |
| TUBB    | P07437         | <a href="#">Q13873</a>         | <a href="#">BMPR2</a>    |
| TUBB    | P07437         | <a href="#">P38398</a>         | <a href="#">BRCA1</a>    |
| TUBB    | P07437         | <a href="#">Q9NV56</a>         | <a href="#">C20orf20</a> |
| TUBB    | P07437         | Postsynaptic protein Cf        | <a href="#">CRIPT</a>    |
| TUBB    | P07437         | <a href="#">Q16555</a>         | <a href="#">DPYSL2</a>   |
| TUBB    | P07437         | <a href="#">P63167</a>         | <a href="#">DYNLL1</a>   |
| TUBB    | P07437         | <a href="#">P03372</a>         | <a href="#">ESR1</a>     |
| TUBB    | P07437         | <a href="#">P63244</a>         | <a href="#">GNB2L1</a>   |
| TUBB    | P07437         | <a href="#">Q13255</a>         | <a href="#">GRM1</a>     |
| TUBB    | P07437         | <a href="#">Q9UBN7</a>         | <a href="#">HDAC6</a>    |
| TUBB    | P07437         | <a href="#">P42858</a>         | <a href="#">HTT</a>      |
| TUBB    | P07437         | <a href="#">P78559</a>         | <a href="#">MAP1A</a>    |
| TUBB    | P07437         | <a href="#">Q02779</a>         | <a href="#">MAP3K10</a>  |

|       |                |                                |                         |
|-------|----------------|--------------------------------|-------------------------|
| TUBB  | P07437         | <a href="#">P27816</a>         | <a href="#">MAP4</a>    |
| TUBB  | P07437         | <a href="#">Q6P3T0</a>         | <a href="#">MAP6</a>    |
| TUBB  | P07437         | <a href="#">P10636</a>         | <a href="#">MAPT</a>    |
| TUBB  | P07437         | <a href="#">Q96L34</a>         | <a href="#">MARK4</a>   |
| TUBB  | P07437         | <a href="#">P20591</a>         | <a href="#">MX1</a>     |
| TUBB  | P07437         | <a href="#">P61601</a>         | <a href="#">NCALD</a>   |
| TUBB  | P07437         | <a href="#">O15259</a>         | <a href="#">NPHP1</a>   |
| TUBB  | P07437         | <a href="#">O60260</a>         | <a href="#">PARK2</a>   |
| TUBB  | P07437         | <a href="#">Q9NQP4</a>         | <a href="#">PFDN4</a>   |
| TUBB  | P07437         | <a href="#">P53350</a>         | <a href="#">PLK1</a>    |
| TUBB  | P07437         | <a href="#">Q92930</a>         | <a href="#">RAB8B</a>   |
| TUBB  | P07437         | <a href="#">Q9NS23</a>         | <a href="#">RASSF1</a>  |
| TUBB  | P07437         | <a href="#">O75056</a>         | <a href="#">SDC3</a>    |
| TUBB  | P07437         | <a href="#">O95793</a>         | <a href="#">STAU1</a>   |
| TUBB  | P07437         | <a href="#">Q86SS6</a>         | <a href="#">SYT9</a>    |
| TUBB  | P07437         | <a href="#">Q9UL54</a>         | <a href="#">TAOK2</a>   |
| TUBB  | P07437         | <a href="#">Q9BTW9</a>         | <a href="#">TBCD</a>    |
| TUBB  | P07437         | <a href="#">P21980</a>         | <a href="#">TGM2</a>    |
| TUBB  | P07437         | <a href="#">Q5TCY1</a>         | <a href="#">TTBK1</a>   |
| TUBB  | P07437         | <a href="#">P33981</a>         | <a href="#">TTK</a>     |
| TUBB  | P07437         | <a href="#">Q71U36</a>         | <a href="#">TUBA1A</a>  |
| TUBB  | P07437         | <a href="#">P15498</a>         | <a href="#">VAV1</a>    |
| TUBB  | P07437         | <a href="#">P31946</a>         | <a href="#">YWHAB</a>   |
| TUBB  | P07437         | <a href="#">P61981</a>         | <a href="#">YWHAG</a>   |
| TUBB  | P07437         | <a href="#">P63104</a>         | <a href="#">YWHAZ</a>   |
| TUBB  | P07437         | <a href="#">P43403</a>         | <a href="#">ZAP70</a>   |
| TUBB  | BioGRID:128444 | <a href="#">BioGRID:120503</a> | <a href="#">ARL8B</a>   |
| TUBB  | BioGRID:128444 | <a href="#">BioGRID:106922</a> | <a href="#">ASCL2</a>   |
| TUBB  | BioGRID:128444 | <a href="#">BioGRID:116686</a> | <a href="#">FNBP1</a>   |
| TUBB  | BioGRID:128444 | <a href="#">BioGRID:114593</a> | <a href="#">HGS</a>     |
| TUBB  | BioGRID:128444 | <a href="#">BioGRID:121760</a> | <a href="#">MARK4</a>   |
| TUBB  | BioGRID:128444 | <a href="#">BioGRID:116691</a> | <a href="#">NCOA6</a>   |
| TUBB  | BioGRID:128444 | <a href="#">BioGRID:110927</a> | <a href="#">NPHP1</a>   |
| TUBB  | BioGRID:128444 | <a href="#">BioGRID:111425</a> | <a href="#">POLH</a>    |
| TUBB  | BioGRID:128444 | <a href="#">BioGRID:114513</a> | <a href="#">PSTPIP1</a> |
| TUBB  | BioGRID:128444 | <a href="#">BioGRID:119719</a> | <a href="#">RAB8B</a>   |
| TUBB  | BioGRID:128444 | <a href="#">BioGRID:116356</a> | <a href="#">RASSF1</a>  |
| TUBB  | BioGRID:128444 | <a href="#">BioGRID:111864</a> | <a href="#">RBBP5</a>   |
| TUBB  | BioGRID:128444 | <a href="#">BioGRID:115027</a> | <a href="#">SDC3</a>    |
| TUBB  | BioGRID:128444 | <a href="#">BioGRID:116593</a> | <a href="#">SIRT2</a>   |
| TUBB  | BioGRID:128444 | <a href="#">BioGRID:114574</a> | <a href="#">SMC3</a>    |
| TUBB  | BioGRID:128444 | <a href="#">BioGRID:112497</a> | <a href="#">SUMO2</a>   |
| TUBB  | BioGRID:128444 | <a href="#">BioGRID:126802</a> | <a href="#">SYT9</a>    |
| VEGFA | AF095785.1     | <a href="#">NP_001521.1</a>    | <a href="#">HIF1A</a>   |
| VEGFA | AF095785.1     | <a href="#">NP_000312.1</a>    | <a href="#">RB1</a>     |
| VEGFA | NP_003367.3    | <a href="#">AAD48080.1</a>     | <a href="#">ADAMTS1</a> |
| VEGFA | NP_003367.3    | <a href="#">NP_002010.1</a>    | <a href="#">FLT1</a>    |
| VEGFA | NP_003367.3    | <a href="#">NP_002010.1</a>    | <a href="#">FLT1</a>    |
| VEGFA | NP_003367.3    | <a href="#">NP_002244.1</a>    | <a href="#">KDR</a>     |
| VEGFA | NP_003367.3    | <a href="#">NP_002244.1</a>    | <a href="#">KDR</a>     |

|       |                |                                |                          |
|-------|----------------|--------------------------------|--------------------------|
| VEGFA | NP_003367.3    | <a href="#">NP_002244.1</a>    | <a href="#">KDR</a>      |
| VEGFA | NP_003367.3    | <a href="#">NP_003864.2</a>    | <a href="#">NRP1</a>     |
| VEGFA | NP_003367.3    | <a href="#">NP_003864.2</a>    | <a href="#">NRP1</a>     |
| VEGFA | NP_003367.3    | <a href="#">NP_957718.1</a>    | <a href="#">NRP2</a>     |
| VEGFA | NP_003367.3    |                                | <a href="#">NRP2</a>     |
| VEGFA | P15692         | <a href="#">Q9UHI8</a>         | <a href="#">ADAMTS1</a>  |
| VEGFA | P15692         | <a href="#">P31749</a>         | <a href="#">AKT1</a>     |
| VEGFA | P15692         | <a href="#">P16989</a>         | <a href="#">CSDA</a>     |
| VEGFA | P15692         | <a href="#">P29279</a>         | <a href="#">CTGF</a>     |
| VEGFA | P15692         | <a href="#">P29323</a>         | <a href="#">EPHB2</a>    |
| VEGFA | P15692         | <a href="#">P17948</a>         | <a href="#">FLT1</a>     |
| VEGFA | P15692         | <a href="#">P35052</a>         | <a href="#">GPC1</a>     |
| VEGFA | P15692         | <a href="#">Q16270</a>         | <a href="#">IGFBP7</a>   |
| VEGFA | P15692         | <a href="#">P35968</a>         | <a href="#">KDR</a>      |
| VEGFA | P15692         | <a href="#">O14786</a>         | <a href="#">NRP1</a>     |
| VEGFA | P15692         | <a href="#">O60462</a>         | <a href="#">NRP2</a>     |
| VEGFA | P15692         | <a href="#">P49763</a>         | <a href="#">PGF</a>      |
| VEGFA | P15692         | <a href="#">Q13275</a>         | <a href="#">SEMA3F</a>   |
| VEGFA | P15692         | <a href="#">P09486</a>         | <a href="#">SPARC</a>    |
| VEGFA | P15692         | <a href="#">P22105</a>         | <a href="#">TNXB</a>     |
| VEGFA | P15692         | <a href="#">P15692</a>         | <a href="#">VEGFA</a>    |
| VEGFA | P15692         | <a href="#">P49765</a>         | <a href="#">VEGFB</a>    |
| VEGFA | P15692         | <a href="#">P04004</a>         | <a href="#">VTN</a>      |
| VEGFA | P15692         | <a href="#">P67809</a>         | <a href="#">YBX1</a>     |
| VEGFA | BioGRID:113265 | <a href="#">BioGRID:114888</a> | <a href="#">ADAMTS1</a>  |
| VEGFA | BioGRID:113265 | <a href="#">BioGRID:107872</a> | <a href="#">CTGF</a>     |
| VEGFA | BioGRID:113265 | <a href="#">BioGRID:109079</a> | <a href="#">GPC1</a>     |
| VEGFA | BioGRID:113265 | <a href="#">BioGRID:109552</a> | <a href="#">HSP90AA1</a> |
| VEGFA | BioGRID:113265 | <a href="#">BioGRID:109540</a> | <a href="#">HSPA4</a>    |
| VEGFA | BioGRID:113265 | <a href="#">BioGRID:109711</a> | <a href="#">IGFBP7</a>   |
| VEGFA | BioGRID:113265 | <a href="#">BioGRID:109992</a> | <a href="#">KDR</a>      |
| VEGFA | BioGRID:113265 | <a href="#">BioGRID:114356</a> | <a href="#">NRP1</a>     |
| VEGFA | BioGRID:113265 | <a href="#">BioGRID:111249</a> | <a href="#">PGF</a>      |
| VEGFA | BioGRID:113265 | <a href="#">BioGRID:112560</a> | <a href="#">SPARC</a>    |
| VEGFA | BioGRID:113265 | <a href="#">BioGRID:113265</a> | <a href="#">VEGFA</a>    |
| VEGFA | BioGRID:113265 | <a href="#">BioGRID:113287</a> | <a href="#">VTN</a>      |
| NOL3  | NP_003937.1    | <a href="#">NP_620116.1</a>    | <a href="#">BAX</a>      |
| NOL3  | NP_003937.1    |                                | <a href="#">CASP8</a>    |
| NOL3  | NP_003937.1    | <a href="#">NP_003815.1</a>    | <a href="#">FADD</a>     |
| NOL3  | NP_003937.1    |                                | <a href="#">FAS</a>      |
| NOL3  | NP_003937.1    | <a href="#">NP_003937.1</a>    | <a href="#">NOL3</a>     |
| NOL3  | O60936         | <a href="#">Q07814</a>         | <a href="#">BAX</a>      |
| NOL3  | O60936         | <a href="#">P42575</a>         | <a href="#">CASP2</a>    |
| NOL3  | O60936         | <a href="#">Q14790</a>         | <a href="#">CASP8</a>    |
| NOL3  | O60936         | <a href="#">P68400</a>         | <a href="#">CSNK2A1</a>  |
| NOL3  | O60936         | <a href="#">Q9NVF9</a>         | <a href="#">ETNK2</a>    |
| NOL3  | O60936         | <a href="#">Q13158</a>         | <a href="#">FADD</a>     |
| NOL3  | O60936         | <a href="#">Q9GZT8</a>         | <a href="#">NIF3L1</a>   |

|      |                |                                |                          |
|------|----------------|--------------------------------|--------------------------|
| NOL3 | O60936         | <a href="#">O60936</a>         | <a href="#">NOL3</a>     |
| NOL3 | O60936         | <a href="#">P78324</a>         | <a href="#">SIRPA</a>    |
| NOL3 | O60936         | <a href="#">Q13242</a>         | <a href="#">SRSF9</a>    |
| NOL3 | O60936         | <a href="#">P0C1Z6</a>         | <a href="#">TFPT</a>     |
| NOL3 | O60936         | <a href="#">P50552</a>         | <a href="#">VASP</a>     |
| NOL3 | BioGRID:114477 | <a href="#">BioGRID:107285</a> | <a href="#">CASP2</a>    |
| NOL3 | BioGRID:114477 | <a href="#">BioGRID:107291</a> | <a href="#">CASP8</a>    |
| NOL3 | BioGRID:114477 | <a href="#">BioGRID:114364</a> | <a href="#">CFLAR</a>    |
| NOL3 | BioGRID:114477 | <a href="#">BioGRID:120519</a> | <a href="#">ETNK2</a>    |
| NOL3 | BioGRID:114477 | <a href="#">BioGRID:114302</a> | <a href="#">FADD</a>     |
| NOL3 | BioGRID:114477 | <a href="#">BioGRID:106851</a> | <a href="#">FAS</a>      |
| NOL3 | BioGRID:114477 | <a href="#">BioGRID:121922</a> | <a href="#">NIF3L1</a>   |
| NOL3 | BioGRID:114477 | <a href="#">BioGRID:114477</a> | <a href="#">NOL3</a>     |
| NOL3 | BioGRID:114477 | <a href="#">BioGRID:118896</a> | <a href="#">PACSIN3</a>  |
| NOL3 | BioGRID:114477 | <a href="#">BioGRID:116440</a> | <a href="#">PNKP</a>     |
| NOL3 | BioGRID:114477 | <a href="#">BioGRID:126752</a> | <a href="#">SIRPA</a>    |
| NOL3 | BioGRID:114477 | <a href="#">BioGRID:114231</a> | <a href="#">SRSF9</a>    |
| NOL3 | BioGRID:114477 | <a href="#">BioGRID:112986</a> | <a href="#">TNFRSF1A</a> |
| NOL3 | BioGRID:114477 | <a href="#">BioGRID:114258</a> | <a href="#">TNFRSF25</a> |
| NOL3 | BioGRID:114477 | <a href="#">BioGRID:114257</a> | <a href="#">TRADD</a>    |
| NOL3 | BioGRID:114477 | <a href="#">BioGRID:113251</a> | <a href="#">VASP</a>     |
| NOL3 | BioGRID:114477 | <a href="#">BioGRID:43363</a>  | <a href="#">ced-3</a>    |

**Gene Database for 13 selected candidate apoptotic genes**

| Interaction Source      | Reference              | Description of Interaction                             |
|-------------------------|------------------------|--------------------------------------------------------|
| <a href="#">BIND</a>    | <a href="#">PubMed</a> | FoxO3a interacts with the BCL2L11 (Bim) promoter.      |
| <a href="#">BIND</a>    | <a href="#">PubMed</a> | Bim interacts with Bcl-2.                              |
| <a href="#">BIND</a>    | <a href="#">PubMed</a> | Bim interacts with Bcl-XL.                             |
| <a href="#">BIND</a>    | <a href="#">PubMed</a> | Bim interacts with Bcl-w.                              |
| <a href="#">HPRD</a>    | <a href="#">PubMed</a> |                                                        |
| <a href="#">HPRD</a>    | <a href="#">PubMed</a> |                                                        |
| <a href="#">HPRD</a>    | <a href="#">PubMed</a> |                                                        |
| <a href="#">HPRD</a>    | <a href="#">PubMed</a> |                                                        |
| <a href="#">HPRD</a>    | <a href="#">PubMed</a> |                                                        |
| <a href="#">HPRD</a>    | <a href="#">PubMed</a> |                                                        |
| <a href="#">HPRD</a>    | <a href="#">PubMed</a> |                                                        |
| <a href="#">HPRD</a>    | <a href="#">PubMed</a> |                                                        |
| <a href="#">HPRD</a>    | <a href="#">PubMed</a> |                                                        |
| <a href="#">HPRD</a>    | <a href="#">PubMed</a> |                                                        |
| <a href="#">HPRD</a>    | <a href="#">PubMed</a> |                                                        |
| <a href="#">HPRD</a>    | <a href="#">PubMed</a> |                                                        |
| <a href="#">HPRD</a>    | <a href="#">PubMed</a> |                                                        |
| <a href="#">HPRD</a>    | <a href="#">PubMed</a> |                                                        |
| <a href="#">BioGRID</a> | <a href="#">PubMed</a> | Affinity Capture-Western; Reconstituted Complex; Tw    |
| <a href="#">BioGRID</a> | <a href="#">PubMed</a> | Two-hybrid                                             |
| <a href="#">BIND</a>    | <a href="#">PubMed</a> | Bcl-XL interacts with Bim. This interaction was modell |
| <a href="#">BioGRID</a> | <a href="#">PubMed</a> | Affinity Capture-Western; FRET; Two-hybrid             |
| <a href="#">BioGRID</a> | <a href="#">PubMed</a> | Affinity Capture-Western; Two-hybrid                   |
| <a href="#">BioGRID</a> | <a href="#">PubMed</a> | Reconstituted Complex                                  |
| <a href="#">BioGRID</a> | <a href="#">PubMed</a> | Reconstituted Complex                                  |
| <a href="#">BioGRID</a> | <a href="#">PubMed</a> | Reconstituted Complex                                  |
| <a href="#">BioGRID</a> | <a href="#">PubMed</a> | Reconstituted Complex                                  |
| <a href="#">BioGRID</a> | <a href="#">PubMed</a> | Affinity Capture-Western; Two-hybrid                   |
| <a href="#">BioGRID</a> | <a href="#">PubMed</a> | Reconstituted Complex                                  |
| <a href="#">BioGRID</a> | <a href="#">PubMed</a> | Affinity Capture-Western                               |
| <a href="#">BioGRID</a> | <a href="#">PubMed</a> | Affinity Capture-Western                               |
| <a href="#">BioGRID</a> | <a href="#">PubMed</a> | Reconstituted Complex                                  |
| <a href="#">BIND</a>    | <a href="#">PubMed</a> | CBP interacts with Bnip3L.                             |
| <a href="#">BIND</a>    | <a href="#">PubMed</a> | p53 interacts with Bnip3L.                             |
| <a href="#">HPRD</a>    | <a href="#">PubMed</a> |                                                        |
| <a href="#">HPRD</a>    | <a href="#">PubMed</a> |                                                        |
| <a href="#">HPRD</a>    | <a href="#">PubMed</a> |                                                        |
| <a href="#">HPRD</a>    | <a href="#">PubMed</a> |                                                        |
| <a href="#">HPRD</a>    | <a href="#">PubMed</a> |                                                        |
| <a href="#">HPRD</a>    | <a href="#">PubMed</a> |                                                        |
| <a href="#">HPRD</a>    | <a href="#">PubMed</a> |                                                        |
| <a href="#">HPRD</a>    | <a href="#">PubMed</a> |                                                        |
| <a href="#">HPRD</a>    | <a href="#">PubMed</a> |                                                        |
| <a href="#">BioGRID</a> | <a href="#">PubMed</a> | Affinity Capture-Western                               |



|                         |                        |                                                       |
|-------------------------|------------------------|-------------------------------------------------------|
| <a href="#">HPRD</a>    | <a href="#">PubMed</a> |                                                       |
| <a href="#">HPRD</a>    | <a href="#">PubMed</a> |                                                       |
| <a href="#">HPRD</a>    | <a href="#">PubMed</a> |                                                       |
| <a href="#">HPRD</a>    | <a href="#">PubMed</a> |                                                       |
| <a href="#">HPRD</a>    | <a href="#">PubMed</a> |                                                       |
| <a href="#">HPRD</a>    | <a href="#">PubMed</a> |                                                       |
| <a href="#">HPRD</a>    | <a href="#">PubMed</a> |                                                       |
| <a href="#">HPRD</a>    | <a href="#">PubMed</a> |                                                       |
| <a href="#">HPRD</a>    | <a href="#">PubMed</a> |                                                       |
| <a href="#">HPRD</a>    | <a href="#">PubMed</a> |                                                       |
| <a href="#">HPRD</a>    | <a href="#">PubMed</a> |                                                       |
| <a href="#">HPRD</a>    | <a href="#">PubMed</a> |                                                       |
| <a href="#">HPRD</a>    | <a href="#">PubMed</a> |                                                       |
| <a href="#">HPRD</a>    | <a href="#">PubMed</a> |                                                       |
| <a href="#">HPRD</a>    | <a href="#">PubMed</a> |                                                       |
| <a href="#">BioGRID</a> | <a href="#">PubMed</a> | Two-hybrid                                            |
| <a href="#">BioGRID</a> | <a href="#">PubMed</a> | Two-hybrid                                            |
| <a href="#">BioGRID</a> | <a href="#">PubMed</a> | Affinity Capture-MS                                   |
| <a href="#">BioGRID</a> | <a href="#">PubMed</a> | Affinity Capture-MS                                   |
| <a href="#">BioGRID</a> | <a href="#">PubMed</a> | Two-hybrid                                            |
| <a href="#">BioGRID</a> | <a href="#">PubMed</a> | Reconstituted Complex; Two-hybrid                     |
| <a href="#">BioGRID</a> | <a href="#">PubMed</a> | Two-hybrid                                            |
| <a href="#">BioGRID</a> | <a href="#">PubMed</a> | Reconstituted Complex                                 |
| <a href="#">BioGRID</a> | <a href="#">PubMed</a> | Affinity Capture-Western; Reconstituted Complex       |
| <a href="#">BioGRID</a> | <a href="#">PubMed</a> | Reconstituted Complex                                 |
| <a href="#">BioGRID</a> | <a href="#">PubMed</a> | Two-hybrid                                            |
| <a href="#">BioGRID</a> | <a href="#">PubMed</a> | Reconstituted Complex                                 |
| <a href="#">BioGRID</a> | <a href="#">PubMed</a> | Reconstituted Complex                                 |
| <a href="#">BioGRID</a> | <a href="#">PubMed</a> | Biochemical Activity                                  |
| <a href="#">BioGRID</a> | <a href="#">PubMed</a> | Affinity Capture-MS                                   |
| <a href="#">BioGRID</a> | <a href="#">PubMed</a> | Two-hybrid                                            |
| <a href="#">BioGRID</a> | <a href="#">PubMed</a> | Affinity Capture-Western; Two-hybrid                  |
| <a href="#">BioGRID</a> | <a href="#">PubMed</a> | Affinity Capture-Western; Reconstituted Complex       |
| <a href="#">BioGRID</a> | <a href="#">PubMed</a> | Two-hybrid                                            |
| <a href="#">BIND</a>    | <a href="#">PubMed</a> | c-Myc interacts with NOXA promoter.                   |
| <a href="#">BIND</a>    | <a href="#">PubMed</a> | Miz1 interacts with NOXA promoter.                    |
| <a href="#">BIND</a>    | <a href="#">PubMed</a> | Noxa interacts with A1. This interaction was modelled |
| <a href="#">HPRD</a>    | <a href="#">PubMed</a> |                                                       |
| <a href="#">HPRD</a>    | <a href="#">PubMed</a> |                                                       |
| <a href="#">HPRD</a>    | <a href="#">PubMed</a> |                                                       |
| <a href="#">HPRD</a>    | <a href="#">PubMed</a> |                                                       |
| <a href="#">HPRD</a>    | <a href="#">PubMed</a> |                                                       |
| <a href="#">HPRD</a>    | <a href="#">PubMed</a> |                                                       |
| <a href="#">HPRD</a>    | <a href="#">PubMed</a> |                                                       |
| <a href="#">BioGRID</a> | <a href="#">PubMed</a> | Affinity Capture-Western                              |
| <a href="#">BioGRID</a> | <a href="#">PubMed</a> | Affinity Capture-Western; Protein-peptide             |
| <a href="#">BioGRID</a> | <a href="#">PubMed</a> | Protein-peptide                                       |
| <a href="#">BioGRID</a> | <a href="#">PubMed</a> | Affinity Capture-Western; Protein-peptide             |
| <a href="#">BioGRID</a> | <a href="#">PubMed</a> | Protein-peptide                                       |
| <a href="#">BioGRID</a> | <a href="#">PubMed</a> | Affinity Capture-Western                              |







|                         |                        |                                                       |
|-------------------------|------------------------|-------------------------------------------------------|
| <a href="#">HPRD</a>    | <a href="#">PubMed</a> |                                                       |
| <a href="#">HPRD</a>    | <a href="#">PubMed</a> |                                                       |
| <a href="#">HPRD</a>    | <a href="#">PubMed</a> |                                                       |
| <a href="#">HPRD</a>    | <a href="#">PubMed</a> |                                                       |
| <a href="#">HPRD</a>    | <a href="#">PubMed</a> |                                                       |
| <a href="#">HPRD</a>    | <a href="#">PubMed</a> |                                                       |
| <a href="#">HPRD</a>    | <a href="#">PubMed</a> |                                                       |
| <a href="#">HPRD</a>    | <a href="#">PubMed</a> |                                                       |
| <a href="#">HPRD</a>    | <a href="#">PubMed</a> |                                                       |
| <a href="#">HPRD</a>    | <a href="#">PubMed</a> |                                                       |
| <a href="#">HPRD</a>    | <a href="#">PubMed</a> |                                                       |
| <a href="#">HPRD</a>    | <a href="#">PubMed</a> |                                                       |
| <a href="#">HPRD</a>    | <a href="#">PubMed</a> |                                                       |
| <a href="#">HPRD</a>    | <a href="#">PubMed</a> |                                                       |
| <a href="#">HPRD</a>    | <a href="#">PubMed</a> |                                                       |
| <a href="#">HPRD</a>    | <a href="#">PubMed</a> |                                                       |
| <a href="#">HPRD</a>    | <a href="#">PubMed</a> |                                                       |
| <a href="#">HPRD</a>    | <a href="#">PubMed</a> |                                                       |
| <a href="#">HPRD</a>    | <a href="#">PubMed</a> |                                                       |
| <a href="#">HPRD</a>    | <a href="#">PubMed</a> |                                                       |
| <a href="#">HPRD</a>    | <a href="#">PubMed</a> |                                                       |
| <a href="#">HPRD</a>    | <a href="#">PubMed</a> |                                                       |
| <a href="#">HPRD</a>    | <a href="#">PubMed</a> |                                                       |
| <a href="#">BioGRID</a> | <a href="#">PubMed</a> | Affinity Capture-Western                              |
| <a href="#">BioGRID</a> | <a href="#">PubMed</a> | Affinity Capture-Western                              |
| <a href="#">BioGRID</a> | <a href="#">PubMed</a> | Affinity Capture-MS                                   |
| <a href="#">BioGRID</a> | <a href="#">PubMed</a> | Reconstituted Complex                                 |
| <a href="#">BioGRID</a> | <a href="#">PubMed</a> | Affinity Capture-MS                                   |
| <a href="#">BioGRID</a> | <a href="#">PubMed</a> | Affinity Capture-MS; Co-purification                  |
| <a href="#">BioGRID</a> | <a href="#">PubMed</a> | Affinity Capture-Western                              |
| <a href="#">BioGRID</a> | <a href="#">PubMed</a> | Affinity Capture-MS                                   |
| <a href="#">BioGRID</a> | <a href="#">PubMed</a> | Affinity Capture-MS                                   |
| <a href="#">BioGRID</a> | <a href="#">PubMed</a> | Affinity Capture-Western                              |
| <a href="#">BioGRID</a> | <a href="#">PubMed</a> | Reconstituted Complex                                 |
| <a href="#">BioGRID</a> | <a href="#">PubMed</a> | Co-purification                                       |
| <a href="#">BioGRID</a> | <a href="#">PubMed</a> | Reconstituted Complex                                 |
| <a href="#">BioGRID</a> | <a href="#">PubMed</a> | Biochemical Activity                                  |
| <a href="#">BioGRID</a> | <a href="#">PubMed</a> | Affinity Capture-Western                              |
| <a href="#">BioGRID</a> | <a href="#">PubMed</a> | Affinity Capture-MS                                   |
| <a href="#">BioGRID</a> | <a href="#">PubMed</a> | Affinity Capture-Western; Reconstituted Complex       |
| <a href="#">BIND</a>    | <a href="#">PubMed</a> | HIF1A (HIF-1-alpha) interacts with the VEGF promote   |
| <a href="#">BIND</a>    | <a href="#">PubMed</a> | RB1 (pRB) interacts with the VEGF promoter.           |
| <a href="#">BIND</a>    | <a href="#">PubMed</a> | ADAMTS1 interacts with VEGF165                        |
| <a href="#">BIND</a>    | <a href="#">PubMed</a> | VEGF-A interacts with VEGFR-1. This interaction was   |
| <a href="#">BIND</a>    | <a href="#">PubMed</a> | VEGF165 interacts with Flt-1. This interaction was mc |
| <a href="#">BIND</a>    | <a href="#">PubMed</a> | VEGF interacts with KDR.                              |
| <a href="#">BIND</a>    | <a href="#">PubMed</a> | VEGF-A interacts with VEGFR-2. This interaction was   |



|                         |                        |                                                                |
|-------------------------|------------------------|----------------------------------------------------------------|
| <a href="#">HPRD</a>    | <a href="#">PubMed</a> |                                                                |
| <a href="#">HPRD</a>    | <a href="#">PubMed</a> |                                                                |
| <a href="#">HPRD</a>    | <a href="#">PubMed</a> |                                                                |
| <a href="#">HPRD</a>    | <a href="#">PubMed</a> |                                                                |
| <a href="#">HPRD</a>    | <a href="#">PubMed</a> |                                                                |
| <a href="#">BioGRID</a> | <a href="#">PubMed</a> | Affinity Capture-Western                                       |
| <a href="#">BioGRID</a> | <a href="#">PubMed</a> | Affinity Capture-Western; Phenotypic Suppression               |
| <a href="#">BioGRID</a> | <a href="#">PubMed</a> | Phenotypic Suppression                                         |
| <a href="#">BioGRID</a> | <a href="#">PubMed</a> | Two-hybrid                                                     |
| <a href="#">BioGRID</a> | <a href="#">PubMed</a> | Phenotypic Suppression                                         |
| <a href="#">BioGRID</a> | <a href="#">PubMed</a> | Phenotypic Suppression                                         |
| <a href="#">BioGRID</a> | <a href="#">PubMed</a> | Two-hybrid                                                     |
| <a href="#">BioGRID</a> | <a href="#">PubMed</a> | Affinity Capture-Western; Two-hybrid                           |
| <a href="#">BioGRID</a> | <a href="#">PubMed</a> | Affinity Capture-MS                                            |
| <a href="#">BioGRID</a> | <a href="#">PubMed</a> | Affinity Capture-MS                                            |
| <a href="#">BioGRID</a> | <a href="#">PubMed</a> | Two-hybrid                                                     |
| <a href="#">BioGRID</a> | <a href="#">PubMed</a> | Affinity Capture-Western; Reconstituted Complex;<br>Two-hybrid |
| <a href="#">BioGRID</a> | <a href="#">PubMed</a> | Phenotypic Suppression                                         |
| <a href="#">BioGRID</a> | <a href="#">PubMed</a> | Phenotypic Suppression                                         |
| <a href="#">BioGRID</a> | <a href="#">PubMed</a> | Phenotypic Suppression                                         |
| <a href="#">BioGRID</a> | <a href="#">PubMed</a> | Two-hybrid                                                     |
| <a href="#">BioGRID</a> | <a href="#">PubMed</a> | Affinity Capture-Western; Phenotypic Suppression               |

ro-hybrid

led on a demonstrated interaction between Bcl-XL from an unspecified species and I

complex; Two-hybrid

complex

western; Protein-peptide

| on a demonstrated interaction between human Noxa and mouse A1.

iP).

pter.

his interaction was modeled on a demonstrated interaction between TRIF from an un  
ealed on a demonstrated interaction between human ZNF216 and A20 from an unspe



stituted Complex; Two-hybrid

stituted Complex; Two-hybrid  
ro-hybrid

».

» modeled on a demonstrated interaction between human VEGF-A and VEGFR-1 from  
» modeled on a demonstrated interaction between human VEGF165 and Flt-1 from an u

» modeled on a demonstrated interaction between human VEGF-A and VEGFR-2 from

modeled on a demonstrated interaction between human VEGF165 and KDR from an u  
was modeled on a demonstrated interaction between human VEGF165 and neuropi

ed Complex



human Bim.





specified species and A20 from an unspecified species.  
specified species.





om an unspecified species.  
nspecified species.

om an unspecified species.

unspecified species.

lin-1 from an unspecified species.
